1 **High-quality, genome-wide SNP genotypic data for pedigreed germplasm of the diploid outbreeding**  
2 **species apple, peach, and sweet cherry through a common workflow**

3

4 Stijn Vanderzande<sup>1,‡,\*</sup>, Nicholas P Howard<sup>2,3,‡</sup>, Lichun Cai<sup>4</sup>, Cassia Da Silva Linge<sup>5</sup>, Laima Antanaviciute<sup>5</sup>,  
5 Marco CAM Bink<sup>6,7</sup>, Johannes W Kruisselbrink<sup>6</sup>, Nahla Bassil<sup>8</sup>, Ksenija Gasic<sup>5</sup>, Amy Iezzoni<sup>4</sup>, Eric Van de  
6 Weg<sup>9</sup>, Cameron Peace<sup>1</sup>

7

8 1 Department of Horticulture, Washington State University, PO Box 646414, Pullman, WA 99164,  
9 USA

10 2 Department of Horticultural Science, University of Minnesota, St Paul, MN 55104, USA

11 3 Institute of Biology and Environmental Sciences, Carl von Ossietzky Universität, 26129  
12 Oldenburg, Germany

13 4 Department of Horticulture, Michigan State University, East Lansing, MI 48824, USA

14 5 Department of Plant and Environmental Sciences, Clemson University, Clemson, South  
15 Carolina, USA

16 6 Biometris, Wageningen UR, PO Box 16, 6700AA, Wageningen, The Netherlands.

17 7 Research & Technology Center, Hendrix Genetics, P.O. Box 114, 5830 AC Boxmeer, The  
18 Netherlands

19 8 USDA-ARS, National Clonal Germplasm Repository, 33447 Peoria Road Corvallis, OR 97333,  
20 United States of America

21 9 Plant Breeding, Wageningen UR, PO Box 386, 6700AJ, Wageningen, The Netherlands

22 ‡ These authors contributed equally

23 \* Corresponding author: [stijn.vanderzande@wsu.edu](mailto:stijn.vanderzande@wsu.edu)

24

25 **Abstract**

26 High-quality genotypic data is a requirement for many genetic analyses. For any crop, errors in genotype  
27 calls, phasing of markers, linkage maps, pedigree records, and unnoticed variation in ploidy levels can  
28 lead to spurious marker-locus-trait associations and incorrect origin assignment of alleles to individuals.  
29 High-throughput genotyping requires automated scoring, as manual inspection of thousands of scored  
30 loci is too time-consuming. However, automated SNP scoring can result in errors that should be  
31 corrected to ensure recorded genotypic data are accurate and thereby ensure confidence in  
32 downstream genetic analyses. To enable quick identification of errors in a large genotypic data set, we  
33 have developed a comprehensive workflow. This multiple-step workflow is based on inheritance  
34 principles and on removal of markers and individuals that do not follow these principles, as  
35 demonstrated here for apple, peach, and sweet cherry. Genotypic data was obtained on pedigreed  
36 germplasm using 6-9K SNP arrays for each crop and a subset of well-performing SNPs was created using  
37 ASSiST. Use of correct (and corrected) pedigree records readily identified violations of simple inheritance  
38 principles in the genotypic data, streamlined with FlexQTL™ software. Retained SNPs were grouped into  
39 haploblocks to increase the information content of single alleles and reduce computational power  
40 needed in downstream genetic analyses. Haploblock borders were defined by recombination locations  
41 detected in ancestral generations of cultivars and selections. Another round of inheritance-checking was  
42 conducted, for haploblock alleles (i.e., haplotypes). High-quality genotypic data sets were created using  
43 this workflow for pedigreed collections representing the U.S. breeding germplasm of apple, peach, and  
44 sweet cherry evaluated within the RosBREED project. These data sets contain 3855, 4005, and 1617  
45 SNPs spread over 932, 103, and 196 haploblocks in apple, peach, and sweet cherry, respectively. The  
46 highly curated phased SNP and haplotype data sets, as well as the raw iScan data, of germplasm in the  
47 apple, peach, and sweet cherry Crop Reference Sets is available through the Genome Database for  
48 Rosaceae.

49

50 **Introduction**

51 A high-quality, mostly error-free genotypic data set is imperative to obtain reliable results in many  
52 downstream genetic analyses. The results of genetic analyses can be influenced by even low rates of  
53 genotyping errors [1]. For example, the size of genetic maps and order of markers therein are affected  
54 by errors in genotypic data [2–4]. Inaccurate genotypic data will also lower the power, accuracy, and  
55 resolution of linkage studies and increase the number of false marker-locus-trait associations [5–7]. The  
56 number of observed (double) recombinants is inflated by errors in genotypic data [8]. Incorrect calling of  
57 recombinations in turn leads to incorrect determination of haploblock limits and assignment of  
58 haplotypes [9]. Finally, incorrect genotype calls can lead to incorrect imputations of missing data or even  
59 the improper adjustment of correct data to ensure the data is consistent with Mendelian inheritance  
60 [10].

61

62 There are several reasons for the occurrence of errors in a genotypic data set. Incorrect information  
63 about a sample’s identity, e.g., due to mixing up or mislabeling samples, causes an individual to be  
64 matched with the wrong data [1]. In clonally propagated crops, mislabeling errors can easily spread  
65 when individuals that are not true-to-type are used as parents or as base plants to create new  
66 propagules. Available pedigree information for an individual can be incorrect, causing incorrect  
67 enforcement of allele assignments. In fruit cultivars, numerous pedigree records have been confirmed or  
68 updated with the help of genetic markers [11–23]. Biological reasons such as unexpected mutation,  
69 insertions or deletions in the DNA sequence containing markers, and gene conversion can lead to  
70 inconsistencies in genotype calls and propagate errors through the data set [1]. Technician errors can  
71 also introduce errors in a data set, such as when lab protocols are not applied correctly (Hoffman and

72 Amos 2005) or when multiple large data sets with disparate formats are integrated and edited. Finally,  
73 technological and software limitations and failures can also lead to the presence of errors [1].  
74  
75 SNPs have become the genetic marker of choice for many genetic analyses but, with their increased use  
76 and increasingly large numbers that can be generated, manual data curation has become more  
77 challenging. SNPs are ubiquitous within the genome and allow for simultaneous screening of many  
78 thousands of polymorphic loci via SNP arrays, Genotyping-By-Sequencing, or resequencing [24,25]. SNP  
79 arrays provide consistent information between individuals and have been developed for clonally  
80 propagated crops, such as the 8K apple array [26], 9K peach array [27], and 6K cherry array [28]  
81 developed by international teams led by RosBREED; the GrapeReSeq 18K Vitis array [29]; the 20K apple  
82 array developed by FruitBreedomics [30], all on the Illumina Infinium® platform, and the strawberry 90K  
83 Axiom array [31], and the 480K apple array by FruitBreedomics on the Affymetrix axion platform [32].  
84 Genotyping each individual relies on the automated scoring of thousands of SNPs. As thousands to  
85 millions of SNPs are being assessed on a large set of individuals, even a low error rate in SNP scoring can  
86 correspond to a high absolute number of errors. As the number of SNPs on an array increase, it becomes  
87 more time-consuming and less feasible to manually review all automated SNP calls to identify potential  
88 errors.  
89  
90 For SNP arrays, incorrect genotype assignment using automated SNP scoring software occurs when  
91 intensity plots deviate from expected patterns. Automated genotyping is based on the association of  
92 specific alleles to different fluorescent molecules, the detection of these fluorescent molecules, the  
93 clustering of individual-marker data points according to intensity ratios between the different  
94 fluorescent dyes across multiple individuals into distinct regions of a genotype-calling space, and the  
95 final assignment of these clusters to genotypes. Examples of deviations that are observed in the

96 intensity plots are the presence of additional clusters or clusters that have shifted from their expected  
97 location in the intensity plot. The presence of additional clusters or shifted clusters can be attributed to  
98 additional regions that bind to the SNP's probe [33]. Sequence similarity of these regions with the  
99 intended target is caused by either local sequence repetition or presence of paralogous regions in the  
100 genome. The presence of these highly similar sequences can lead to multi-locus segregating SNP  
101 markers that cannot be adequately called. The calling of a single segregating locus might also be  
102 hampered by the background signal of targeted but non-segregating gene copies (ASSIST Reference  
103 Manual p17 [34]). The presence of one or more additional SNPs, insertions, or deletions in the probe-  
104 binding region can lead to reduced or loss of binding affinity for the SNP's probe and thereby to the  
105 presence of additional clusters, both of which can lead to incorrect genotype scoring of some SNPs [33].

106

107 No systematic workflow exists to efficiently detect and resolve all types of errors from a genotypic data  
108 set for pedigreed germplasm. Methods and software exist to tackle specific types of errors. For example,  
109 the ASSIST software was developed for use with Illumina Infinium® arrays to identify which SNPs show  
110 robust results, which SNPs might have genotype calling errors due to alleles with reduced affinity or null  
111 alleles, and which SNPs are monomorphic or failed completely [35]. Another example is the aggregation  
112 of linked SNPs into a single genetic locus, called haploblock, which facilitates tracking the inheritance of  
113 alleles within a pedigree and subsequent identification of inheritance inconsistencies [36]. Despite the  
114 existence these and other methods and software, an effective way to combine these methods has not  
115 been described.

116

117 Here we describe a curation workflow for high-resolution genetic marker data that identifies and  
118 resolves errors to obtain a robust set of genotypic data. The workflow maximizes the genotypic data  
119 obtained from high-throughput genome-scanning tools while minimizing the time needed to identify

120 and remove errors. The workflow resulted from curation needs in the multi state and multi-crop USDA-  
121 SCRI project RosBREED [37–39] and the European project FruitBreedomics [40–42]. The workflow is  
122 demonstrated for three tree fruit crops, apple, peach, and sweet cherry, using the RosBREED germplasm  
123 sets [43]. The resulting genotypic data sets can be used by researchers to reconstruct pedigrees,  
124 establish quantitative genetic relationships, identify and validate quantitative trait loci (QTLs), and trace  
125 allele sources, leading to valuable practical and scientific genetic insights – with high confidence in the  
126 obtained results.

127

## 128 **Material and Methods**

129

### 130 *Plant material*

131 The apple, peach, and sweet cherry collections used in this study, referred to as the ‘Crop Reference  
132 Sets’, were created to represent U.S. breeding germplasm [43] for the RosBREED project [37]  
133 ([www.rosbreed.org](http://www.rosbreed.org)) and consisted of 451, 426, and 269 individuals for apple, peach, and sweet cherry,  
134 respectively (Tables S1-S3). Three apple breeding programs (Washington State University, the University  
135 of Minnesota, and Cornell University), three peach breeding programs (University of Arkansas, Clemson  
136 University, and Texas A&M University), and one sweet cherry program (Washington State University)  
137 each contributed additional germplasm to complement the Crop Reference Sets and better represent  
138 their important breeding parents [43]. These additional ‘Breeding Pedigree Sets’ consisted of 172, 139,  
139 and 167 apple individuals, 117, 289, and 143, peach individuals, and 259 sweet cherry individuals,  
140 respectively. The sweet cherry Breeding Pedigree Set was later made publicly available and became part  
141 of the sweet cherry Crop Reference Set. Genotypic data of the other Breeding Pedigree Sets were  
142 included as part of the data curation but individual identities of this private germplasm are not provided.

143

144 To reduce the trimming of pedigrees (as described under ‘Haploblock and haplotype generation’ below),  
145 the genotype calls of 18 additional apple individuals genotyped with the 20K SNP array in the  
146 FruitBreedomics project [42] or genotyped with the 8K SNP array at KU Leuven, Belgium (Table S1) were  
147 added to the data set to complete genotypic data of key ancestors.

148

#### 149 Initial parentage information

150 Initial parentage information was collected as part of the germplasm creation as described by Peace and  
151 co-workers (2014) [43]. For each breeding program, breeders provided pedigree records for their  
152 seedlings, selections, and released cultivars. Other pedigree records were based on historical records  
153 and available literature and were included for all progenitors, regardless of availability so that all  
154 progenitors terminated in founders (individuals with two unknown parents).

155

#### 156 DNA extraction and iScan

157 DNA extraction was conducted for apple, peach, and sweet cherry as described by Chagné and co-  
158 workers (2012) [26], Verde and co-workers (2012) [27], and Peace and co-workers (2012) [28],  
159 respectively. Genomic DNA from each individual was purified using the E-Z 96 Tissue DNA Kit (Omega  
160 Bio-Tek, Inc., Norcross, GA, USA). DNA was quantitated with the Quant-iT™ PicoGreen® Assay  
161 (Invitrogen, Carlsbad, CA, USA), using the Victor multiplate reader (Perkin Elmer Inc., San Jose, CA, USA).  
162 DNA concentrations were adjusted to a minimum of 50 ng/μl, in 5 μl aliquots. For apple, DNA samples  
163 were run on the Illumina Infinium® 8K apple SNP array [26] with iScans either at the Biotechnology  
164 Platform of the Agricultural Research Council (Pretoria, South Africa) or at the Research Technology  
165 Support Facility at Michigan State University (East Lansing, MI, USA), following the manufacturer's  
166 protocol (Illumina Inc.). For peach and sweet cherry, DNA samples were run on the 9K peach SNP array  
167 [27] and 6K cherry SNP array [28], respectively, with an iScan at the Research Technology Support

168 Facility at Michigan State University (East Lansing, MI, USA), following the manufacturer's protocol  
169 (Illumina Inc.).

170

171 *Initial genetic maps*

172 For each crop, available genetic maps were used as a framework to determine the initial order of  
173 reliable SNPs. Reliable SNPs (obtained as described under 'Subset of reliable SNP obtainment' below)  
174 that were not present in available genetic maps were incorporated by comparing their physical positions  
175 to those of flanking SNPs that were present in available genetic maps.

176

177 For apple, an integrated genetic map based on five full-sib families with 'Honeycrisp' as common parent  
178 [20] was used as a framework to help align additional SNPs on the 8K array. The relative order of SNPs in  
179 the map of Howard and co-workers (2017) [20] was adjusted to be consistent with the 'Golden  
180 Delicious' double haploid genome sequence v1.1 [44] whenever this did not result in false detection of  
181 double recombination for the original mapping populations. Then, SNPs that were included in the iGL  
182 map [45] but not included by Howard and co-workers (2017) [20] were aligned based on relative marker  
183 order between common markers of both maps and the 'Golden Delicious' double haploid genome  
184 sequence v1.1 [44]. In cases of conflict between the iGL map and the reference genome, only the iGL  
185 map was used as reference. Genetic positions of newly added SNPs were determined so that, in the new  
186 map, they had the same position relative to the position of flanking markers as these SNPs did in the iGL  
187 map. Finally, any remaining unmapped SNPs were positioned based solely on relative physical positions  
188 according to the 'Golden Delicious' double haploid genome sequence v1.1 [44]. When the genetic  
189 position in the iGL map was known for repositioned or newly added SNPs, their genetic position in the  
190 new map was determined so that they had the same position relative to the position of flanking markers  
191 as they did in the iGL map. When no genetic position in the iGL map was available, the genetic position



192 was determined so that, in the new map, they had the same position relative to the position of flanking  
193 markers as they did in the physical genome. In peach, genetic positions were based on the peach  
194 physical position of peach genome v2.0 [46]. The peach physical map was scaled to an approximate  
195 genetic map by using a conversion factor where every 1 Mb corresponded to 4 cM. For sweet cherry,  
196 genetic positions were determined by aligning and integrating the physical positions using peach  
197 genome v2.0 [46] with the sweet cherry ‘Regina’ × ‘Lapins’ SNP linkage map [21,47].

198

### 199 Workflow procedures

200 Throughout the workflow, several software packages were used. Below are described the main  
201 procedures used in the workflow, the associated software and parameter settings, and output files  
202 used. The order in which each functionality was used in the workflow is reported in Results section  
203 ‘Steps of the data curation workflow’.

204

#### 205 *Initial genotypic data obtainment (GenomeStudio®)*

206 iScan output was converted to ‘AA’, ‘AB’, and ‘BB’ genotype calls for each SNP marker with the  
207 Genotyping module of GenomeStudio® v2011.1 (Illumina Inc., San Diego, CA, USA) using a sample sheet  
208 to load sample intensities and a ‘Gen Call’ Threshold of 0.15 to assign samples to a genotype cluster. The  
209 sample sheet was adjusted in Microsoft Excel as follows before using it as input for GenomeStudio®:

- 210 • The sample sheet was saved as an ‘xls(x)’ file to avoid the loss of ‘SentryBarcode’ information  
211 that occasionally occurs when saving it as a ‘.csv’ file.
- 212 • When individuals were separated over multiple iScan runs and sample sheets, the ‘[Data]’  
213 sections of each sample sheet were combined into one.
- 214 • A copy of the ‘Sample\_ID’ column in the ‘[Data]’ section was added and named  
215 ‘Sample\_Original’.

- 216       • Sample names in the 'Sample\_ID' were adjusted to remove any spaces or special characters  
217       (needed for some software) and avoid long names or names that could be interpreted as dates  
218       (or other special formats) by Excel.
- 219       • Duplicate and parental information was added to the 'Replicate', 'Parent1', and 'Parent2'  
220       columns considering the adjusted names in the 'Sample\_ID' column.
- 221       • The resulting sample sheet was saved both as a '.xlsx' file for future editing and as a '.csv' file to  
222       serve as an input file for GenomeStudio®.

223

224       *Low-quality and non-diploid sample identification (GenomeStudio® and R)*

225       Quality and ploidy were assessed using each sample's B-allele frequencies calculated by  
226       GenomeStudio®. In GenomeStudio®, the histogram of the B-allele frequency was plotted for each  
227       individual by opening the 'Histogram plot' function of the 'Full Data Table', choosing the first individual  
228       in the 'Columns' section, and then choosing 'B Allele Freq' in the 'Sub Columns' section. The histogram  
229       for the 'B-allele frequency' could then be plotted for each individual by scrolling through the individuals  
230       in the 'Columns' section. Samples were considered of good quality when a clear heterozygous peak was  
231       observed around 0.5 with almost no SNPs having a B-allele frequency between 0.125 and 0.375 and  
232       between 0.625 and 0.75. In contrast, samples of poor quality showed no clear heterozygous peak  
233       around 0.5 and had many SNPs with a B allele-frequency between 0.125 and 0.375, and between 0.625  
234       and 0.75. Individuals that showed more than three peaks in the histogram were classified as polyploid.  
235       Individuals that showed a 'shoulder' on the AB peak were classified as putative aneuploids and were  
236       examined further in B-allele frequency plots according to Chagné and co-workers (2015) [48], below.

237

238       To create B-allele frequency plots according to Chagné and co-workers (2015) [48], a subset of SNPs was  
239       created by applying the filter parameters described in Table S4A in the 'SNP Table' of GenomeStudio®.

240 Next, the 'Full Data Table' of GenomeStudio® was adjusted to only contain the B-allele frequency of  
241 each sample: in the 'Column Chooser' function of GenomeStudio®, 'B Allele Freq' was added to the  
242 'Displayed Subcolumns' section while all other subcolumns were removed from this section. The  
243 resulting 'Full Data Table' was exported using the 'export displayed data to a file' function. The exported  
244 'Data Table' was further adjusted to the following format: the first column contained the SNPs name,  
245 the second column contained the SNP's cumulative position, and all subsequent columns contained the  
246 samples' B-allele-frequencies.

247  
248 Each SNP's cumulative genomic position was determined as follows: the chromosome number  
249 corresponding to the SNP was multiplied by the power of ten which ensured that the outcome was  
250 larger than any possible position within any chromosome (e.g., if the largest physical position within any  
251 chromosome was 456,437 bp, all chromosome numbers were multiplied by 1,000,000 or  $10^6$  as this is  
252 the first power of 10 that is larger than 456,437. Similarly, if the largest genetic position within any  
253 chromosome was 145 cM, each chromosome number was multiplied by 1000 or  $10^3$ ). Then, the physical  
254 or genetic position within the chromosome was added to the adjusted chromosome number to obtain  
255 the cumulative genomic position of that SNP. The resulting file was then loaded into R [49].

256  
257 An ad hoc R-script (Document S1) generated a pdf file that contained a plot for each individual where 'B-  
258 allele frequency' values were plotted for the subset of SNP markers that were ordered according to their  
259 cumulative position on a genetic linkage map or reference genome sequence. 'B-allele frequency' values  
260 were expected to be 0, 0.5, or 1 for diploids. Diploid samples were considered of sufficient quality when  
261 *almost no* SNPs (<0.3% of the subset) were observed between 0.125-0.375 and 0.625-0.875. In contrast,  
262 a sample was considered of intermediate or poor quality when many SNP markers (0.3%-3% and >3%,  
263 respectively) showed an intermediate or large discrepancy. For triploids, 'B-allele frequency' values were

264 expected to be 0, 0.33, 0.66, and 1 for all chromosomes while values of 0, 0.25, 0.5, 0.75, and 1.0 were  
265 expected for tetraploids. Aneuploids had a diploid pattern for most chromosomes and a haploid or  
266 polyploid pattern for others. Individuals classified as poor quality, polyploid, and aneuploid were  
267 excluded from further analyses.

268

269 Samples were excluded from various input files and from the genotype clustering in GenomeStudio® by  
270 choosing them in the 'Samples Table' and then choosing the 'Exclude Selected Samples'. SNPs were then  
271 re-clustered by choosing the 'Cluster All SNPs' of the 'Analysis' section. All statistics were updated when  
272 prompted.

273

#### 274 *Subset of reliable SNP obtainment (ASSIST)*

275 The 'Final report' and 'DNA report' input files were created as described in the ASSIST Reference Manual  
276 [34]. Briefly, a 'Final Report' and 'DNA Report' were generated using the 'Report Wizard' under the  
277 'Reports' option of the 'Analysis' section. The best 'redo' was chosen based on the '10<sup>th</sup> Percentile GC  
278 score' and excluded samples were removed from the report. For the 'Final Report', 'GTScore', 'Theta',  
279 and 'R' were added to the default 'Displayed Fields' and data was grouped 'by SNP'. For the 'DNA  
280 Report', samples were exported by 'Sample ID'.

281

282 The pedigree input file was created in Excel by copying the 'Sample\_ID', 'Parent1', and 'Parent2'  
283 columns from the '[Data]' section of the sample sheet used to create the GenomeStudio® project,  
284 adjusting the column names to '//SampleID', 'Mother', and 'Father', respectively, and saving the  
285 resulting file as a tab-delimited text file. The (optional) map was created in Excel by having the SNP  
286 Names as given by GenomeStudio® in the first column and their corresponding chromosome and  
287 position within the chromosome (either physical or genetic) as the second and third column,

288 respectively. Column names were set to '//SNPid', 'Chromosome', and 'Position' and the resulting file  
289 was saved as a tab-delimited text file

290

291 All input files were loaded into ASSIsT v1.01 [35] using the 'Select' button. Then, parameters were set  
292 using the 'Set' button as described in Table S4B depending on the 'Population type' used. ASSIsT  
293 distinguished eight marker classes, which were re-grouped into the following five categories:

- 294 • Robust SNPs: having less than 5% No Call Rate and all three possible clusters (AA, AB, and BB)  
295 present in the germplasm set. In ASSIsT, these SNPs were classified as 'Robust',  
296 'OneHomozygRare\_HWE', 'OneHomozygRare\_NoHWE', and 'DistortedAndUnexSegreg'
- 297 • Two cluster SNPs: having less than 5% No Call Rate and one of the homozygous clusters (AA or  
298 BB) absent in the germplasm set. In ASSIsT, these SNPs were classified as 'ShiftHomo'
- 299 • Null-allele SNPs: having a probable null allele, classified as 'NullAllele-Failed' in ASSIsT
- 300 • Monomorphic SNPs: having no polymorphism, as in ASSIsT
- 301 • Failed SNPs: having more than 50% No Call Rate, poor clustering, or low intensity, as in ASSIsT

302

303 Results of SNP performance in ASSIsT were exported to the 'Summary' and 'Custom SNP information  
304 table'. Genotype calls were saved in 'Custom gtypes' to be used in the R-script that checked pedigree  
305 records (described below in 'Pedigree records verification'). PLINK input files were generated to check  
306 for unknown duplicates within the data (described below in 'Duplicate individuals detection') and  
307 FQ\_DataPrepper input files were created to easily generate FlexQTL input files using FQDataPrepper  
308 (described below in 'Genotyping error detection and adjustment'). Genotype calls for the 'Robust SNPs'  
309 category were automatically reported in ASSIsT output files whereas other categories were considered  
310 to contain failed SNPs and thus their genotype calls were not automatically reported. To include

311 genotype calls of the ‘Two cluster SNPs’, genotype calls of such SNPs were extracted from  
312 GenomeStudio® and added to the data files manually.

313

314 *Duplicate individuals detection (GenomeStudio® and Plink)*

315 Genotypic data of known mutants and duplicates were compared to ensure their genotypic data were  
316 matching using the ‘Reproducibility and Heritability’ report of GenomeStudio®  
317 (Analysis>Reports>Reproducibility and Heritability Report>with Calculating Errors). The data set was also  
318 screened for individuals with (unknown) identical genotypic data using Plink 1.9 [50] (<https://www.cog->  
319 [genomics.org/plink2](https://www.cog-genomics.org/plink2)). Plink input files generated with ASSiST were copied into the folder that contained  
320 the PLINK executable (plink.exe). Then, a ‘command window’ or ‘PowerShell window’ was opened in this  
321 folder and the ‘plink.exe --file [filename] --missing-genotype - --genome full’ or ‘\plink.exe --file  
322 [filename] --missing-genotype - --genome full’ command was given, respectively, where [filename] was  
323 the name of the PLINK input files used. The resulting ‘plink.genome’ was opened in Excel and the  
324 ‘PI\_HAT’ column was used to represent the proportion of identity-by-descent (IBD) between each pair of  
325 individuals. Pairs of individuals with an IBD proportion higher than 97% were considered to be  
326 duplicates because at this stage all known duplicates shared an IBD proportion of at least 97%. If  
327 individuals were true duplicates, only one was kept in the data set. If pedigree records differed between  
328 duplicate individuals, pedigree records were used to identify trueness-to-type as described below. True-  
329 to type individuals were kept in the data set and individuals that were not true-to-type were targeted  
330 for DNA re-sampling. Where two unselected seedlings from the same family were identified as  
331 duplicates, they were both targeted for re-sampling as it was unclear which of the two was true-to-type.

332

333

334

335 *Pedigree records verification (GenomeStudio<sup>®</sup>, Cervus, and R)*

336 Verification of pedigree records was performed by counting the Mendelian-inconsistent errors between  
337 an individual and (each of) its recorded parent(s) where genotypic data was available. These errors were  
338 genotypic data inconsistent with Mendel's first law, i.e., alleles present in offspring but not present in  
339 either parent. First, parent-child (PC) errors between an individual and a single parent were defined as  
340 genotype calls where none of the parental alleles were present in the offspring. For example, the  
341 recorded offspring might be 'BB', 'B null', or 'null null' while the recorded parent was 'AA'. In this  
342 example, neither the 'B' allele nor the 'null' alleles were present in the parent. Secondly, when both  
343 parents were known and confirmed, the combination of the two parents' SNP data were compared to  
344 the offspring's SNP data to identify parent-parent-child (PPC) errors. PPC errors were defined as  
345 genotype calls where at least one allele of the offspring was not present in any of its recorded parents.  
346 For example, in the case of an 'AA' x 'AA' -> 'AB' triplet, no PC error would be observed when checking  
347 each parent individually, as both parents could have contributed the 'A' allele to the offspring. However,  
348 combination of the two parents would create a PPC error as neither parent could have contributed the  
349 'B' allele observed in the offspring.

350

351 Three ways to count Mendelian-inconsistent errors were compared. In GenomeStudio<sup>®</sup>, a  
352 'Reproducibility and Heritability' (Analysis>Reports>Reproducibility and Heritability Report>with  
353 Calculating Errors) was generated to obtain the number of PC and PPC errors. Mendelian-inconsistent  
354 errors were calculated in the software Cervus [51] using default parameter settings. Third, an ad hoc R-  
355 script (Document S2) was used to check and identify PC and PPC relationships.

356

357 The '.gtypes' ASSIsT output file was further adjusted to the following format: the first column contained  
358 an individual's 'Sample ID', the second and third columns contained the individual's 'Mother ID' and

359 'Father ID', respectively, and the subsequent columns contained the individual's genotypic data. Any  
360 missing parental information was set to '-'. All alleles found in the data set were defined in the  
361 'AlleleList' parameter whereas characters used for missing genotypes or missing alleles were defined in  
362 the 'MissGT' and 'MissAllele' parameters respectively. After loading all functions defined in the R-script,  
363 the 'CheckParAll()' function was used to identify Mendelian-inconsistent errors for individuals with at  
364 least one known parent in the data set. When an individual's supposed parent was not genotyped but  
365 the supposed grandparents were genotyped, the grandparents-grandchild relationship was tested with  
366 the AB+AA-AA test in Excel using the template provided by van de Weg and co-workers (2018) [23].

367  
368 A threshold was determined for the proportion of PC errors to confirm or reject PC relations using  
369 incompletely curated marker data. PC errors were counted for a thousand pairs of two random  
370 individuals in the data set that did not have a (known) PC relationship and for all pairs of individuals that  
371 had a known PC relationship. A separation was observed between the resulting distributions of PC errors  
372 for the two sets of individuals and a midway point between both distributions was used as threshold to  
373 reject parentage of an individual. Similarly, a threshold was determined to accept or reject the  
374 combination of two parents; observed PPC errors were counted for previously confirmed PPC  
375 relationships and a threshold set as 110% of the highest number observed PPC errors among these  
376 known relationships.

377  
378 In cases of missing or erroneous parent information, efforts were made to identify the missing parent  
379 and, if not possible, to identify sets of possible grandparents. Hereto, all available selected material was  
380 examined (ancestors, direct parents, and breeding selections). In apple and peach, the  
381 'FindPosParComb()' function of the ad hoc R-script (Document S2) was used to find PC and PPC  
382 relationships. The maximum number of PC errors and PPC errors to still accept a PC relationship and PPC



383 relationship, respectively, were set with the ‘thresholdPE’ and ‘thresholdPPE’ parameters of the  
384 ‘FindPosParComb()’ function, respectively. In cherry, the software Cervus [51] was used to count these  
385 errors and determine possible parents using the default parameter settings. When no second possible  
386 parent was found in the data set, possible grandparents were identified in Excel using the template  
387 provided by van de Weg and co-workers (2018) [23]. Historic records (e.g., location and time of origin) of  
388 possible grandparents were checked to ensure feasibility. Furthermore, deduced grandparent-  
389 grandchild relationships were only kept if they did not lead to a large number of reported errors during  
390 the rest of the workflow.

391

392 Pedigree information was then updated in various input files and in GenomeStudio® (Analysis>Edit  
393 Parental Relationships; then choosing individual and correct parents from drop-down menu) for further  
394 analyses. All statistics in GenomeStudio® were updated when prompted.

395

396 *Genotyping error detection and adjustment (GenomeStudio®, FlexQTL™, and Visual FlexQTL™)*

397 Genotyping errors were divided in two classes: Mendelian-inconsistent errors and Mendelian-consistent  
398 errors [10]. Unlike Mendelian-inconsistent errors, Mendelian-consistent errors are errors that do not  
399 infringe upon Mendel’s first law: a child’s false allele call is present in one of the parents, but results in  
400 problematic co-segregation patterns that show unexpected double recombination between markers  
401 with successive genetic/physical positions. These double recombinations might be due to issues in  
402 ploidy, calling, marker ordering, or phasing or, occasionally, gene conversion [10] (Document S3).

403

404 For individuals with verified pedigree relationships, remaining Mendelian-inconsistent errors were  
405 detected using GenomeStudio® and FlexQTL™ v0.99130. In GenomeStudio®, the ‘SNP Table’ was filtered  
406 for SNPs with Mendelian-inconsistent errors, the ‘Error Table’ was used to identify individuals with

407 Mendelian-inconsistent errors, and the ‘SNP Graph’ was used to examine the reported errors. FlexQTL™  
408 input files were prepared using FlexQTL DataPrepper v1.0.0.4  
409 (<https://www.wur.nl/en/show/FlexQTL.htm>). Three input files were needed to run FlexQTL  
410 DataPrepper: a map file, a pedigree file, and a data file. The map file was obtained by adjusting the  
411 ASSiST map input file as follows: Column names were changed to ‘MarkerId’, ‘Group’, and ‘Position’ and  
412 the file was saved as a comma-delimited file (.csv). The pedigree file was obtained by adjusting the  
413 ASSiST pedigree input file as follows: column names were changed to ‘Name’, ‘Parent1’, and ‘Parent2’  
414 and the file was saved in the ‘.csv’ format. The data file was obtained by converting the  
415 ‘FlexQTLDataPrepper’ from ASSiST to the ‘.csv’ format. The data file (.dat) generated by FlexQTL  
416 DataPrepper was adjusted to ensure all individuals had either both parents specified or none. Any  
417 individual that had only one known parent was given a dummy parent. These dummy parents, as well as  
418 any named parent not in the data set, were added to the data input file with all their genotypic data set  
419 to missing. FlexQTL™ was used to check for Mendelian-inconsistent errors (parameter settings in Table  
420 S4C). Briefly, FlexQTL™ was run through using an early stop (‘pedimapV’ parameter set to ‘2’; to stop  
421 after checking the data for inconsistencies) and allowing for segregation distortion (‘MSegDelta’  
422 parameter set to 1). This analysis summarized for each marker and each individual how many  
423 Mendelian-inconsistent errors were observed in the ‘mconsistency.csv’ file.  
424  
425 Mendelian-consistent errors were detected by examining double recombinations detected over small  
426 regions (<10 cM) as reported by FlexQTL™ and Visual FlexQTL™. Parameter settings of FlexQTL™ to  
427 check for double-recombinations were the same as for Mendelian-inconsistent errors above (Table S4C).  
428 The FlexQTL™ output file named ‘DoubleRecomb.csv’ listed all singletons (single markers involved in a  
429 double recombination) in the data set. Visual FlexQTL™ instead identifies all double recombinations  
430 (including singletons) that occur within a given genetic distance. The default for this distance was 10 cM

431 and could be changed under 'Tools>Calculate>(Re-)Compute recombination sequences'. The report on  
432 double recombinations was created through 'Tools>Export>Export recombination sequence file' which  
433 provided an output file called 'DoubleRecombinations.csv'.

434  
435 Genotype calls of SNPs with Mendelian-inconsistent errors or SNPs involved in detected double  
436 recombinations were further examined in GenomeStudio® using the 'SNP Graph'. Where incorrect  
437 cluster identification was detected, clusters were manually called using the 'SNP Graph' and FlexQTL™  
438 was run again to ensure errors were resolved. Individuals belonging to a single cluster were chosen  
439 using the 'Lasso Mode' of the 'SNP Graph'. After 'right-clicking' on the 'SNP Graph', the 'Define X Cluster  
440 Using Selected Samples' was chosen where 'X' was the appropriate genotype cluster ('AA', 'AB', or 'BB').  
441 The few SNPs that could not have their genotype clusters assigned simultaneously in GenomeStudio®  
442 (e.g., because clusters were too closely positioned; one of the clusters for homozygous individuals was  
443 between  $x=0.4$  and  $x=0.6$ , which is true for part of the paralogous SNP one of the homozygous clusters  
444 according to the ASSiST Reference Manual p14 [34]; or because null alleles were present) were  
445 genotyped as follows. Individuals belonging to a single cluster were selected using the 'Lasso Mode' of  
446 the 'SNP Graph' in GenomeStudio®. 'Sample\_IDs' of the chosen individuals were transferred to Excel by  
447 highlighting the 'Sample\_ID' column in the 'Sample Table', using the 'copy' function of the 'Samples  
448 Table', and pasting them into Excel. In Excel, the copied 'SampleIDs' were then assigned a genotype call.  
449 This process was repeated until all individuals had their genotype assigned. If genotype calls could not  
450 be accurately made, the SNP was considered to have failed and removed from the data set.

451  
452 Identification of Mendelian-inconsistent and Mendelian-consistent errors were also performed at the  
453 haplotype level, conducted as described above at the single SNP level. Where an unidentified error in  
454 SNP genotype scoring was detected, the corresponding SNP genotype calls were adjusted. If the calling

455 error occurred in a single or few individuals, haplotypes were manually adjusted to reflect the change in  
456 SNP allele. In the rare event that a large group of individuals had their SNP genotype calls adjusted, the  
457 corresponding haplotypes were re-determined using PediHaplotyper [36]. Where Mendelian-  
458 inconsistent errors were due to missing SNP alleles, the individual was compared to its parent and  
459 offspring to determine the correct haplotype. For example, if an individual had a SNP haplotype of 'A-?-  
460 B-A' and the haplotype was not present in either parent, but a parent had a haplotype of 'A-A-B-A' and  
461 no haplotype of 'A-B-B-A', the haplotype of the offspring would be set to 'A-A-B-A'. If both 'A-A-B-A' and  
462 'A-B-B-A' were present in the parent, information of flanking, linked haplotypes were checked to assess  
463 if the offspring's haplotype could be determined by minimizing the number of recombinations. Where  
464 inconsistencies in selected material were suspected to be due to a recombination in an ungenotyped  
465 progenitor, the haploblock was split in two at the suspected recombination site to avoid tracking in  
466 downstream genetics analyses of recombination in selected material. The haplotypes for those two new  
467 haploblocks were determined again using PediHaplotyper.

468

469 *Map error detection and adjustment (FlexQTL™, Visual FlexQTL™, and Microsoft Excel)*

470 Where double recombinations were observed and these recombinations were not due to incorrect  
471 genotype scoring, a graphical genotyping approach was used to examine and possibly adjust SNP order  
472 in the genetic map [52]. Graphical genotyping plots were created starting from the 'SIP\_Population.csv'  
473 output file of FlexQTL™ (Document S3). FlexQTL™ was run again to ensure the errors were resolved and  
474 only if the adjustment of the SNP order did not lead to new double recombinations, a change in order  
475 was accepted. SNPs were removed from the data set if they had unexpectedly high incidences of double  
476 recombinations that could not be resolved by repositioning the SNPs in the map. Additionally, where a  
477 SNP mapped to multiple locations in different families, the SNP was removed from the data set.

478

479           *Haploblock and haplotype determination (FlexQTL™, Visual FlexQTL™, and PediHaplotyper)*

480 Haploblocks were defined as regions in which no recombination was observed for selected material. For

481 phasing, parental information in the data input file of FlexQTL™ was adjusted so that the pedigree was

482 trimmed to remove intermediate progenitors without genotypic data unless they were represented by

483 more than four direct offspring. Because Visual FlexQTL™ does not consider any individual without

484 offspring (e.g., new breeding selections) in haploblock determination, dummy offspring with missing

485 genotypic data were added for individuals that did not have any offspring in the data set yet whose

486 recombinations were desired to contribute to determination of haploblock borders. The data was

487 phased using FlexQTL™ (parameter settings in Table S4D). Next, Visual FlexQTL™ was used to define

488 haploblock borders under ‘Tools>Export>Export haplotype blocks file’, creating the ‘HaploBlocks.map’

489 file that assigns each marker to a haploblock and could be used as input for PediHaplotyper.

490

491 For SNP phasing within haploblocks, the pedigree had to be trimmed as in haploblock determination to

492 remove intermediate progenitors without genotypic data unless they were represented by more than

493 four direct offspring. However, dummy offspring introduced for haploblock determination were

494 removed again before phasing the data. FlexQTL™ was then run again (parameter settings in Table S4D),

495 with the output file named ‘mhaplotypes.csv’, which was used as an input for PediHaplotyper.

496

497 The PediHaplotyper package [36] was loaded into R and the working directory was set to the location of

498 the input files created above (‘HaploBlocks.map’, ‘mhaplotypes.csv’, ‘flexqtl.par’, and ‘flexqtl.sort’). In R,

499 the function ‘fq\_haplotyping\_session(sessionID=‘prefix’, mapfile=‘HaploBlocks.map’)’ was used to

500 create the haplotype output files in the working directory where ‘prefix’ was user-defined text that

501 prefixed all output file names. The ‘prefix\_hballeles.dat’ output file listed the composition of each

502 haplotype of each haploblock and the ‘prefix\_flexqtl.dat’, ‘prefix\_flexqtl.map’, and ‘prefix\_flexqtl.par’

503 output files were used as input files for FlexQTL™ for further data curation of the haplotyped data sets  
504 (resolving both Mendelian-inconsistent and Mendelian-consistent errors as described under  
505 '*Genotyping error detection and adjustment*').

506

#### 507 *SNP classification*

508 A SNP classifications system was established to track clustering issues and minimize future curation of  
509 new data. SNPs that passed the filter criteria from ASSiST and that were included in the final data set  
510 were classified into four types: type 1 SNPs had no or less than 5% call editing during the curation  
511 process and no additional genotype clusters were present; type 2 SNPs had an incorrect automated  
512 cluster identification of one of the genotype clusters (e.g., 'AA' cluster called as 'AB'), showed no  
513 additional clusters, and could easily be corrected; type 3 SNPs showed additional clusters because of  
514 alleles with differential intensity signals but individuals could easily be called correctly; and type 4 SNPs  
515 had null alleles but individuals with null alleles could be distinguished easily from true homozygous  
516 individuals. Type 5 SNPs could be accurately called but their genetic or physical position could not be  
517 determined accurately and were not included in the map and final data set. Type 6 SNPs were  
518 monomorphic across all individuals. Type 7 SNPs were those considered as 'Failed' by ASSiST or were  
519 removed during the workflow because their genotype calls could not be manually resolved.

520

#### 521 *Workflow creation and implementation*

522 A workflow was constructed by identifying necessary steps of data curation and ordering them in such a  
523 way that the amount of time needed for data curation is minimized at each step. Thus, errors addressed  
524 first were those relatively easy to identify and resolve and otherwise expected to cause problems at  
525 multiple steps. The workflow was an outcome of efforts in RosBREED and FruitBreedomics on data  
526 curation in apple, peach, and cherry. Statistics at each step of curation were determined from

527 implementing this workflow on the RosBREED germplasm described in the ‘Plant Material’ section  
 528 above.

529

530 **Results**

531

532 Steps of the data curation workflow

533 Initial error-detection resulted in a list of possible causes for each type of detected errors (Table 1). This  
 534 list identified which issues had to be resolved first and as such resulted in the workflow described below  
 535 (Figure 1, Document S3). The workflow developed had three main parts, each with multiple steps. The  
 536 first main part ensures that genetic principles can be applied, the second main part applies these  
 537 principles on a single marker level, and the last main part applies these principles at the haploblock  
 538 level. The proposed steps within each main part are described below, as conducted for apple, peach,  
 539 and sweet cherry.

540

541

542 Table 1: Errors observed during the curation process and their possible causes. Causes that  
 543 should be (mostly) already resolved by the stage a researcher would start checking for specific errors are  
 544 in parentheses and grey font.

| <b>Error</b>                                        | <b>Cause</b>                  | <b>Solution</b>                      |
|-----------------------------------------------------|-------------------------------|--------------------------------------|
| Low call rate and impossible cluster identification | Probe binding issues          | Remove SNP from data set             |
| Unexpected B-allele frequencies                     | <i>(Probe binding issues)</i> | <i>(Remove SNP from data set)</i>    |
|                                                     | Unexpected ploidy             | Remove sample from data set          |
|                                                     | Low sample quality            | Remove sample from data set          |
| High number P(P)C errors                            | <i>(Probe binding issues)</i> | <i>(Remove SNP from data set)</i>    |
|                                                     | <i>(Low sample quality)</i>   | <i>(Remove sample from data set)</i> |
|                                                     | Incorrect pedigree            | Adjust pedigree record               |
|                                                     | Incorrect clustering          | Manually determine genotype clusters |

|                                   |                                                               |                                                                                    |
|-----------------------------------|---------------------------------------------------------------|------------------------------------------------------------------------------------|
|                                   | Incorrect genotype call(s) not due to cluster issues          | Adjust genotype call(s) or remove SNP from data set                                |
| Low number P(P)C errors           | <i>(Probe binding issues)</i>                                 | <i>(Remove SNP from data set)</i>                                                  |
|                                   | <i>(Low sample quality)</i>                                   | <i>(Remove sample from data set)</i>                                               |
|                                   | <i>(Incorrect pedigree)</i>                                   | <i>(Adjust pedigree record)</i>                                                    |
|                                   | Incorrect clustering                                          | Manually determine genotype clusters                                               |
|                                   | Incorrect genotype call(s) not due to cluster issues          | Adjust genotype call(s)                                                            |
| High number double recombinations | <i>(Probe binding issues)</i>                                 | <i>(Remove SNP from data set)</i>                                                  |
|                                   | <i>(Low sample quality)</i>                                   | <i>(Remove sample from data set)</i>                                               |
|                                   | <i>(Incorrect pedigree)</i>                                   | <i>(Adjust pedigree record)</i>                                                    |
|                                   | <i>(Unexpected ploidy)</i>                                    | <i>(Remove sample from data set)</i>                                               |
|                                   | Incorrect clustering                                          | Manually determine genotype clusters                                               |
|                                   | Incorrect marker position in map                              | Adjust marker position or remove marker if it cannot be accurately mapped          |
|                                   | Incorrect genotype call(s) not due to cluster issues          | Adjust genotype call(s)                                                            |
|                                   | Incorrect phasing                                             | Find responsible individual and make genotype missing                              |
| Low number double recombinations  | <i>(Probe binding issues)</i>                                 | <i>(Remove SNP from data set)</i>                                                  |
|                                   | <i>(Low sample quality)</i>                                   | <i>(Remove sample from data set)</i>                                               |
|                                   | <i>(Incorrect pedigree)</i>                                   | <i>(Adjust pedigree record)</i>                                                    |
|                                   | <i>(Incorrect clustering)</i>                                 | <i>(Manually determine genotype clusters)</i>                                      |
|                                   | <i>Nearby double recombination*</i>                           | Resolve nearby double recombination                                                |
|                                   | Incorrect marker position in map                              | Adjust marker position or remove marker if it cannot be accurately mapped          |
|                                   | Incorrect genotype call(s) not due to cluster issues          | Adjust genotype call(s)                                                            |
|                                   | Incorrect phasing                                             | Wait for haploblock analysis to resolve issue                                      |
| Incorrect haplotype determination | <i>(Probe binding issues)</i>                                 | <i>(Remove SNP from data set)</i>                                                  |
|                                   | <i>(Low sample quality)</i>                                   | <i>(Remove sample from data set)</i>                                               |
|                                   | <i>(Incorrect pedigree)</i>                                   | <i>(Adjust pedigree record)</i>                                                    |
|                                   | <i>(Incorrect clustering)</i>                                 | <i>(Manually determine genotype clusters)</i>                                      |
|                                   | <i>(Incorrect marker position in map)</i>                     | <i>(Adjust marker position or remove marker if it cannot be accurately mapped)</i> |
|                                   | <i>(Incorrect genotype call(s) not due to cluster issues)</i> | <i>(Adjust genotype call(s))</i>                                                   |
|                                   | Incorrect phasing                                             | Manually correct phasing (determine correct haplotypes)                            |
|                                   | Recombination within haplotype                                | Adjust haploblock borders                                                          |



---

\*Nearby double recombination can occur for two adjacent markers with many double recombinations and markers with few double recombinations. However, nearby double recombinations rarely lead to a high number of double recombinations for a single marker

545

546

547           Figure 1: Steps of the high-resolution genotypic data curation workflow to ensure a quick and  
548 efficient curation process. Steps that identify errors are shown in white boxes; procedures needed for  
549 detecting, keeping track of, and resolving errors but do not identify errors directly are in grey boxes.  
550 After obtaining a first set of genotypic data, initial steps ensure that inheritance principles can be readily  
551 applied by removing individuals and markers that do not follow these principles and by ensuring  
552 pedigree records are correct. In the next set of steps, inheritance principles are applied at the individual  
553 marker level. In the final set of steps, these principles are applied at the haploblock level. Output used to  
554 detect and resolve observed errors at each step are given in italics. The leaf symbol indicates errors at  
555 the level of individual; the intensity plots symbol indicates errors at the level of SNP scoring; the genetic  
556 map symbol indicates errors at the level of genetically linked markers and phased alleles. When applying  
557 inheritance principles in parts 2 and 3, alleles that do not occur in an individual's parents ('Mendelian-  
558 inconsistent errors') are first resolved before addressing remaining genotyping errors ('Mendelian-  
559 consistent errors'). Several procedures, such as marker call adjustments and map order adjustments, are  
560 performed throughout the steps of the workflow to resolve errors detected. Each time after performing  
561 these common procedures, specific steps of the workflow must be repeated, forming an iterative  
562 process that ends when all errors are resolved.

563

564

565

566

567 *1. Ensuring inheritance principles can be applied*

568 After creating an initial data set of genotypic data set in GenomeStudio®, a first set of analyses was  
569 performed. Because genotypic errors are identified based on principles of inheritance in diploids,  
570 individuals and markers that do not to follow these principles had to be removed first (Figure 1). When  
571 doing so, individuals with unexpected intensity patterns had to be removed first (Figure 1) as they were  
572 influencing the clustering of all individuals in the germplasm. Individuals with poor quality DNA were  
573 usually poorly genotyped, resulting in many data inconsistencies. Additionally, polyploids (individuals  
574 having one or more additional full chromosome sets) and aneuploids (individuals having an irregular  
575 number of copies for one or more chromosomes) were expected to have intensity ratios for  
576 heterozygous loci that differed from diploid individuals. Removal of individuals with poor DNA quality  
577 and suspected polyploids and aneuploids was observed to improve genotype cluster definitions and  
578 thereby the genotype calling of remaining individuals.

579

580 Once individuals with ploidy and sample quality issues were removed, a set of well performing markers  
581 had to be obtained (Figure 1). Markers with unreliable scoring were observed to lead to many  
582 inconsistencies in subsequent steps. Thus, their early removal would ensure that a relatively low  
583 number of inconsistencies remained in the data set, expected to greatly reduce the observed  
584 inconsistencies and time needed for further steps.

585

586 Identifying and correcting incorrect PC and PPC relationships was a prerequisite to using pedigree  
587 information for the identification of marker calling errors in each data set. Imposing principles of  
588 inheritance on actually unrelated individuals led to many false errors at the marker and map level.  
589 Conversely, identifying thus far unknown PC and PPC relations helped to identify errors at the marker  
590 and map level elsewhere in the data set and was expected to improve the power of downstream QTL

591 analyses. Thus, recorded pedigree information needed to be validated and previously unknown pedigree  
592 relationships deduced before curating individual marker calls and marker order errors (Figure 1).  
593 Duplicate individuals were also detected at this stage as they could help resolve sampling errors and  
594 reduce the number of individuals needing detailed error-checking.

595

596

## 597 *2. Applying inheritance principles at the marker level*

598 When Mendelian-inconsistent errors were present, at least one allele was incorrect. This issue had to be  
599 resolved before the (corrected) allele could be phased with the alleles of flanking markers. Otherwise,  
600 even the other allele, which might have been correct, could have been incorrectly phased with the  
601 alleles of flanking markers, causing additional observed but false recombinations. Thus, to minimize the  
602 time required to resolve Mendelian-consistent errors by investigating many supposed double  
603 recombinations, Mendelian-inconsistent errors had to be addressed first.

604

605 Markers with a high number of errors were investigated before markers with a relatively low number of  
606 errors among progenitors. Then, markers with a low number of errors for seedlings were investigated as  
607 they were expected to have the least effect on the remaining data set.

608

609 Any supposed double recombinations that occurred at the same region in multiple individuals had to be  
610 resolved first as they were very unlikely, could be due to a single error, and could influence a large set of  
611 individuals. Next, suspicious double recombinations that occurred over multiple loci in ancestors had to  
612 be checked, followed by singletons in ancestors. Finally, singletons in seedlings were checked, but they  
613 were expected to be the least harmful when incorrect because of little to no effect on the remaining  
614 data set.

615

616 When no genotype calling or map errors were detected, phasing errors were investigated by checking  
617 the phasing of individuals that shared the parent whose homolog was observed to have a double  
618 recombination. In the rare case that incorrect phasing by FlexQTL™ led to a double recombination in  
619 multiple individuals of a single family or parent, it was always caused by one or two individuals in which  
620 the position of (a single) recombination was incorrectly determined. In those cases, individual(s) for  
621 which the SNP was involved in a single recombination had their genotype set to missing. This adjustment  
622 led to correct phasing of all other individuals and removal of reported double recombinations. Double  
623 recombinations that were observed in a single individual and that were not due to incorrect genotype  
624 clustering or incorrect map positions were accepted as the result of true double recombination events.

625

### 626 *3. Applying inheritance principles at the haploblock level*

627 Haploblock and haplotype determination was based on correctly identifying recombinations through  
628 correct phasing across generations and combining individual SNP alleles into haplotypes. Thus, any  
629 remaining errors at the SNP level or map level were expected to lead to errors in haploblock and  
630 haplotype determination. Therefore, all observed inconsistencies at the individual SNP level had to be  
631 resolved before inconsistencies were detected at the haploblock level. The genetic principles applied  
632 throughout the workflow are expected to also hold up at the haploblock level and therefore haplotypes  
633 had to be checked for Mendelian-consistent errors and Mendelian-inconsistent errors.

634

635

636

637

638

639 Implementation of the workflow on RosBREED apple, peach, and sweet cherry germplasm

640

641 *1a. Removing samples: non-diploid individuals and low-quality samples*

642 In apple, the 'B allele frequency' plot of 744 of the diploid individuals (80.7 %) was very close to that  
643 expected for diploid individuals (Figure 2A; Table S1) and results of these diploid individuals were  
644 considered to be of good quality. Another 71 individuals (7.7%) showed some variation from the  
645 expected B allele frequency, especially for homozygous SNPs, but the three genotypes could be easily  
646 distinguished (Figure 2B; Table S1) and their results quality was considered to be intermediate. Finally,  
647 107 (11.6%) had 'B allele frequency' plots that showed a wide variation around the expected frequency  
648 (Figure 2C; Table S1) and their results quality was considered to be bad. No individuals with bad quality  
649 results were found for peach or sweet cherry.

650

651

652 Figure 2: Histograms of B-allele frequency (left) and B-allele frequency for each SNP plotted  
653 against its genomic position (right). Such histograms were used to assess a sample's genotyping quality  
654 and ploidy. Examples shown are of a sample with good quality genotype calls (panel A), with  
655 intermediate quality of genotype calls (B), with bad quality of genotype calls (C), and that is triploid (D).

656

657

658 For apple, most individuals with poor quality results had their DNA extracts transported outside the U.S.  
659 for genotyping and the poor results were suspected to be caused by a reduction in DNA quality due to  
660 the delay in clearing customs, while only nine individuals with poor quality were from those genotyped  
661 in the U.S. The call rate in GenomeStudio<sup>®</sup> differed between the individuals that had good, intermediate,  
662 or bad quality, with the call rate dropping as the level of quality lowered (Figure S2).

663

664 For apple, five triploid individuals were identified (Table S1). One was the known triploid cultivar  
665 ‘Jonagold’ while the others were unselected seedlings (Table S1; Figure S1A). Two other unselected  
666 seedlings had their B-allele frequencies divided over 5 clusters of the GenomeStudio® plot, which  
667 indicated they could be tetraploid or a mixture of two samples (Table S1; Figure S1B). No aneuploids  
668 were detected in the apple germplasm. However, one individual from the Crop Reference Set, ‘AE213-  
669 200’ and one individual of a Breeding Pedigree Set were identified as segmental aneuploids (missing one  
670 copy of a large chromosomal segment). They were undetectable in the B-allele frequency analysis and  
671 instead identified by a relatively large number of PC errors and double recombinations observed for only  
672 that chromosomal segment. No polyploids, aneuploids, or segmental aneuploids were detected in peach  
673 and sweet cherry.

674

675 The final number of individuals used in the rest of the workflow was 835, 621, and 528 for apple, peach,  
676 and sweet cherry, respectively, consisting of 139, 48, and 56 direct parents of full-sib families, ancestors,  
677 and cultivars, 76, 24, and 9 selections and 620, 548, and 463 unselected seedlings over 45, 26, and 41  
678 families of 4–62 full-sibs, respectively (Tables S1-S3).

679

#### 680 *1b. Obtaining a set of reliable SNPs*

681

682 A subset of SNPs with reliable genotyping scores was obtained using ASSIsT (Table 2). Although  
683 discarded by ASSIsT, SNPs from the ‘Two cluster SNPs’ category were retained as many of them were  
684 considered to contain useful information. A total of 4636 (59%), 6098 (75%), and 1727 (30%) of the SNPs  
685 on the apple, peach, and cherry arrays, respectively, were maintained after filtering. Subsequent steps  
686 of the workflow reduced the number of SNPs in the final data set further to 3855, 4005, and 1617 for

687 apple, peach, and sweet cherry, respectively. Thus 83%, 66%, and 91% of the SNPs retained after using  
 688 ASSiST for apple, peach, and sweet cherry, respectively, resulted in high-quality data.

689

690

691 Table 2: Summary of SNP classification by ASSiST for apple, peach, and sweet cherry. SNP

692 classifications are grouped in retained and discarded SNPs.

| <b>SNP classification</b>    | <b>Apple</b> | <b>Peach</b> | <b>Sweet Cherry</b> |
|------------------------------|--------------|--------------|---------------------|
| <b><u>Retained SNPs</u></b>  |              |              |                     |
| <i>Robust SNPs</i>           |              |              |                     |
| Robust                       | 1435         | 743          | 373                 |
| OneHomozygRare_HWE           | 368          | 62           | 109                 |
| OneHomozygRare_NotHWE        | 369          | 188          | 161                 |
| DistortedAndUnexSegreg       | 1364         | 3696         | 555                 |
| <i>Other</i>                 |              |              |                     |
| Two cluster SNPs             | 1100         | 1409         | 529                 |
| <i>Total</i>                 | <i>4636</i>  | <i>6098</i>  | <i>1727</i>         |
| <b><u>Discarded SNPs</u></b> |              |              |                     |
| NullAllele-Failed            | 57           | 145          | 43                  |
| Monomorphic                  | 1307         | 1057         | 3478                |
| Failed                       | 2888         | 844          | 448                 |
| <i>Total</i>                 | <i>4252</i>  | <i>2056</i>  | <i>3969</i>         |
| <b><u>Total</u></b>          | <b>8888</b>  | <b>8144</b>  | <b>5696</b>         |

693

694

695 *1c. Correcting pedigree information and identifying duplicates*

696 The number of PC errors in apple between two randomly paired individuals without PC relationship  
 697 averaged 195, with a minimum of 17 (comparison between two full-sibs) and 99% of these comparisons  
 698 had more than 40 errors. In contrast, average and maximum number of PC errors between two related  
 699 individuals with a known PC relationship was 2 and 17, respectively, and 99% of these comparisons had  
 700 less than 10 PC errors. The threshold to reject a PC relationship was set at 23 errors, which roughly  
 701 corresponded to 0.5% of total markers. For 103, 66, and 22 individuals, one recorded parent was

702 incorrect in apple, peach, and sweet cherry respectively, and for 36, 14, and zero individuals, both  
703 recorded parents were incorrect. For 106, 1, and 19 of these individuals in apple, peach, and sweet  
704 cherry, one or both of the true parent(s) was found within the germplasm set. The final number of  
705 generations spanned by the corrected pedigrees was eight, nine, and six for apple, peach and sweet  
706 cherry, respectively.

707

#### 708 *2a. Finding Mendelian-inconsistent errors at the SNP level*

709 FlexQTL™ summarized the number of Mendelian-inconsistent errors for each marker and each  
710 individual. In GenomeStudio®, the ‘SNP Table’ would summarize the number of P(P)C errors for each  
711 SNP and a separate ‘Error Table’ had to be consulted to determine which individuals were involved in  
712 these errors. FlexQTL™ mostly reported the error under the parent, the R-script reported the error  
713 under the offspring, and the ‘Error Table’ of GenomeStudio® reported the genotypes of both parent(s)  
714 and offspring. As a consequence, errors between a single parent and multiple of its offspring would be  
715 reported as one erroneous (parental) genotype in FlexQTL™ whereas GenomeStudio® reported the  
716 error for each offspring. However, FlexQTL™ did identify errors between grandparents and  
717 grandchildren when the missing parental genotype could be imputed.

718

719 FlexQTL™ detected 1209, 2230, and 686 Mendelian-inconsistent errors distributed over 541, 760, and  
720 42 SNPs in apple, peach, and sweet cherry respectively. In apple, GenomeStudio® detected 10,201 PC  
721 errors and PPC errors over 2303 SNPs. Although GenomeStudio® identified which pairs of individuals led  
722 to these errors, some of the detected Mendelian-inconsistent errors did not occur in the data set due to  
723 differences in genotype scoring between ASSIsT and GenomeStudio®. Before removal of these  
724 Mendelian-inconsistent errors, 41,717, 29,009, and 2505 double recombinations involving a single  
725 marker were detected in FlexQTL™ in apple, peach, and sweet cherry, respectively, through the



726 'DoubleRecomb.csv' file, whereas only 6177, 4905, and 1739, respectively, of these recombinations  
727 were observed after removal of all Mendelian-inconsistent errors.

728

729 *2b. Identifying Mendelian-consistent errors at the SNP level*

730 Most double recombinations that occurred in the same genomic region in many individuals could be  
731 resolved by adjusting incorrect marker calls. A total of 648, zero, and 209 markers in apple, peach, and  
732 sweet cherry, respectively, had one or more of their genotype calls adjusted to resolve double  
733 recombinations. Most other double recombinations that occurred in multiple families could be resolved  
734 by repositioning the marker in the genetic map using a graphical genotyping approach. In total, 115,  
735 zero, and zero ### SNPs were moved from their original position in the map to resolve double  
736 recombinations for apple, peach, and sweet cherry, respectively. Many recombination events that  
737 occurred in a single or few individuals over a single marker were resolved by first resolving the double  
738 recombinations that occurred in many individuals. Most of the remaining double recombinations were  
739 solved by either changing single incorrect genotype call or adjusting marker order in the map. Only a few  
740 phasing issues were observed where (almost) all offspring of a founder showed a double recombination  
741 that could be resolved by adjusting the phase of the alleles in that founder. A total of 15, 156, and 63  
742 markers were discarded for apple, peach, and sweet cherry, respectively, because they led to  
743 unresolvable map issues. The total number of remaining reported singletons was 68, 47, 51 for apple,  
744 peach, and sweet cherry, respectively, and these were considered to be true double recombinations.

745

746 During data curation, genetic maps were generated for each crop (Tables S5-S7) by adding new SNPs to  
747 existing maps, by converting physical positions into genetic positions, and/or by updating initial genetic  
748 positions to minimize the number of double recombinations. For apple, 885 SNPs were added and 658  
749 previously-mapped SNPs were removed as they did not perform well in our wider germplasm. Addition

750 of SNPs at the chromosome ends enlarged the original map by 7 cM. The resulting apple map was 1179  
751 cM long with chromosome lengths ranging from 57.6 cM (linkage group (LG) 6) to 103.6 cM (LG 15). The  
752 number of SNPs on each LG ranged from 167 SNPs on LG 6 to 359 SNPs on LG 2. The genetic map of  
753 peach was 893.2 cM long; LG 5 was the shortest (72.9 cM) and LG 1 was the longest (190.2 cM). The  
754 number of SNPs on each LG ranged from 294 on LG 5 to 772 on LG 4. In sweet cherry, chromosome  
755 lengths ranged from 56.8 cM (LG 5) to 141.2 cM (LG 1), with a total map length of 655.4 cM. The  
756 number of SNPs on each LG ranged from 137 on LG 5 to 350 on LG 1.

757

### 758 *3. Determining and resolving errors for haploblocks and haplotypes*

759 The genetic maps of apple, peach, and sweet cherry were at first divided in 840, 103, 132 haploblocks,  
760 respectively, within which no recombination was observed in selected germplasm. After haplotype  
761 generation, 1262, 2012, and 74 Mendelian-inconsistent errors were reported by the mconsistency.csv  
762 file generated by FlexQTL™. An additional 124, 429, and 64 recombinations were detected within the  
763 haploblocks for selected germplasm, resulting in the generation of additional haploblocks. The  
764 remaining Mendelian-inconsistent errors were mostly due to missing data within a haplotype that could  
765 not be resolved automatically. This missing data within haplotypes led to the assignment of haplotype  
766 numbers that were different to parental haplotypes that were therefore perceived as errors. In addition,  
767 some inconsistencies between SNP data and haplotype data were observed after haplotype generation  
768 that were easily resolved by looking at the 'SNP Graph' in GenomeStudio® and adjusting either the  
769 haplotype or the SNP call.

770

771 The final number of haploblocks was 964, 135, and 196 for apple, peach, and sweet cherry respectively.  
772 For apple, the genetic length of the haploblocks varied between 0 and 7.77 cM with an average of 0.3  
773 cM, the haploblocks contained between 1 and 15 SNPs, and the haploblocks contained an average of 4

774 SNPs. The number of haploblocks per apple LG ranged from 42 on LG 6 to 79 on LG 15, with an average  
775 of 57 haploblocks per LG. In peach, the length of the haploblocks varied between 0 cM and 30.47 cM  
776 with an average of 5.8 cM, the haploblocks contained between 1 and 210 SNPs, and the haploblocks  
777 contained an average of 30 SNPs. The number of haploblocks per peach LG ranged from 7 on LG 5 to 37  
778 on LG 4, with an average of 17 haploblocks per LG. For sweet cherry, haploblocks had an average length  
779 of 2.6 cM, with a minimum of 0 cM and a maximum of 15.0 cM. The average number of SNPs per sweet  
780 cherry haploblock was 8, with a minimum of 1 and a maximum of 61 SNPs. The average number of  
781 haploblocks per sweet cherry LG was 24, with a minimum of 16 haploblocks on LG 5 and LG 7 and a  
782 maximum of 47 haploblocks on LG 1.

783

784

#### 785 *SNP classification system*

786 The final number of SNPs in the haplotyped data set was 3858, 4005, and 1617 for apple, peach, and  
787 sweet cherry, respectively. A total of 3350 (87%), 4005 (100%), and 1610 (99.6%) of these SNPs were  
788 classified as type 1 SNPs, which ultimately needed editing for less than 5% of their genotype calls in  
789 apple, peach, and sweet cherry, respectively (Tables S8-10). Type 2 SNPs, for which genotype clusters  
790 were shifted, totaled 300 (8%), zero, and seven (0.4%) SNPs for apple, peach, and sweet cherry,  
791 respectively, and this shift in cluster position lead to incorrect identification of one of the three clusters  
792 in the original automatic clustering by GenomeStudio®. Type 3, SNPs with additional clusters, were  
793 assigned to 80 (2%), zero, and zero SNPs in apple, peach, and sweet cherry, respectively, and this  
794 presence of additional clusters led to incorrect genotype scoring of these SNPs that required subsequent  
795 curation. Type 4, SNPs with null alleles, were assigned to for 125 (3%), 145 (excluded from the final data  
796 set), and 43 (excluded from the final data set) SNPs in apple, peach, and sweet cherry, respectively, and  
797 these null alleles prevented correct automatic scoring for some individuals.

798

799 **Discussion**

800 We established a workflow to efficiently and confidently identify and remove genotyping errors from  
801 genotyped and pedigreed germplasm sets for apple, peach, and sweet cherry. The proposed workflow  
802 (Figure 1) enables directed identification of markers and individuals with genotyping errors. It uses  
803 simple genetic principles such as inheritance of parental alleles, the co-segregation of linked markers,  
804 and the likelihood of double recombinations to find these errors. The order of steps was determined to  
805 efficiently minimize errors found in later steps and thereby minimize overall time needed to find errors  
806 in the data set. For example, in apple, any incorrect PC relationship would lead to an average of 196  
807 reported Mendelian-inconsistent errors, and any unresolved Mendelian-inconsistent errors led to an  
808 average of 30 more reported Mendelian-consistent errors. The developed workflow was demonstrated  
809 on Illumina SNP array data and some software is specific to this platform, but the same workflow order  
810 and genetic principles are appropriate for other marker types and genotyping platforms. The workflow is  
811 especially useful when medium- and high-throughput genotyping tools are used for which checking each  
812 individual marker would be too time-consuming.

813

814

815 Table 3: Recommended software for each step of the genetic marker data curation workflow

816 when using Illumina Infinium® SNP arrays.

| <b>Workflow step</b>                                          | <b>Recommended software</b>                                                                   |
|---------------------------------------------------------------|-----------------------------------------------------------------------------------------------|
| Identify polyploids, aneuploids, and samples with low quality | GenomeStudio® to obtain B-allele frequencies,<br>R to plot B-allele frequency for each sample |
| Create subset of reliable SNPs                                | ASSIST                                                                                        |
| Identify duplicate samples                                    | PLINK                                                                                         |
| Identify incorrect P(P)C relationships                        | GenomeStudio®                                                                                 |
| Identify unknown P(P)C relationships                          | R                                                                                             |
| Identify unknown grandparent-grandchild relationships         | Excel*                                                                                        |

|                                                                |                                 |
|----------------------------------------------------------------|---------------------------------|
| Identify and resolve (remaining) Mendelian-inconsistent errors | GenomeStudio®, FlexQTL™         |
| Identify and resolve Mendelian-consistent errors               | Visual FlexQTL™ + GenomeStudio® |
| Identify and correct map order inconsistencies                 | Visual FlexQTL™                 |
| Identify phasing issues                                        | FlexQTL™ + Visual FlexQTL™      |
| Haploblock border determination                                | Visual FlexQTL™                 |
| Haplotype determination                                        |                                 |
| - Phasing                                                      | FlexQTL™                        |
| - Haplotype assignment                                         | PediHaplotyper                  |
| - Curation (automated)                                         | FlexQTL™                        |

817 \* Template in Suppl. File 1 of Van de Weg and co-workers (2018) [23]

818

819

820 Order and considerations of workflow steps

821 Different types of errors can be present in genotypic and pedigree data, caused by different kinds of  
 822 issues (Table 1). To minimize the time needed for curation of these data, the proposed error checks  
 823 need to be performed in a specific order. By first tackling issues that are common for many types of  
 824 errors, subsequent curation of remaining errors becomes easier and quicker.

825

826 *Removing individuals with low quality or irregular number of chromosome sets*

827 The B-allele frequency plots provided a quick and easy way to identify and remove individuals with an  
 828 irregular number of chromosome sets (polyploids and aneuploids) and individuals with low DNA quality.  
 829 Removal of such individuals improved SNP calling and thus reduced the number of errors to be dealt  
 830 with in later steps. A couple of individuals with poor quality that were originally kept, because of their  
 831 importance as breeding parents, resulted in many PC errors. Making all their original SNP calls missing  
 832 enabled automated imputation of most of these data points based on genetic information of relatives.  
 833 Subsequent re-genotyping of these individuals matched the imputed data completely, confirming that  
 834 the errors observed were due to low-quality DNA samples and not to incorrect PC relationships.  
 835 Polyploid and aneuploid individuals did not show a higher number of P(P)C errors, as expected. In

836 contrast, these chromosome number abnormalities led to higher rates of false double recombination,  
837 either genome-wide (polyploid) or local [(segmental) aneuploids], that cannot be readily resolved other  
838 than by removal of these specific individuals.

839

840 The histogram function in GenomeStudio® enabled quick identification of polyploids and individuals  
841 with very poor DNA samples without the need for additional steps in Excel, R, or other software.  
842 However, identification of aneuploids and individuals with potentially low-quality DNA samples was not  
843 as straightforward. Plotting the B-allele frequency against physical or genetic marker order (when  
844 available) required additional data manipulation and generation of the plots in software outside  
845 GenomeStudio®, but most of it could be automated using R and custom scripts. Therefore, we suggest  
846 using GenomeStudio® for initial removal of poor-quality samples and polyploids, and afterwards, when  
847 positional information for the markers is available, screening for aneuploids with the method described  
848 by Chagné et al. (2015).

849

#### 850 Obtaining a set of reliable SNPs

851 SNPs with major scoring issues that cannot be easily resolved manually need to be removed from the  
852 data set. The early detection and removal of these unreliable SNPs greatly reduces the number of  
853 marker and map errors reported, as well as the time spent evaluating these SNPs in later workflow  
854 stages. By using ASSiST, a quick subset of SNPs with robust genotype calls could be generated. On  
855 average across the three crops, 80% of this subset was retained in the final data set, which is lower than  
856 the 99% for single full-sib families that was reported by Di Guardo and co-workers (2015) [35]. As the  
857 number of generations and full-sib families in the germplasm increase, more SNPs with null alleles are  
858 likely to be detected and the more complicated the genotype calling of these SNPs can become. In turn,

859 this can lead to an increased discarding of SNPs, which could explain the lower proportion of SNPs  
860 retained in our germplasm sets compared to that reported by Di Guardo and co-workers (2015) [35].

861

862 Markers with null alleles identified by ASSiST were removed from the data set, as they could only be  
863 identified and automatically called in specific  $F_1$  families rather than in all families and across  
864 generations. However, many SNPs with null alleles that were later identified in the workflow could be  
865 accurately genotyped manually as long as homozygous 'AA' and 'BB' individuals could be distinguished  
866 from individuals that carried a null allele. This distinction was time-consuming and therefore we  
867 recommend saving these SNPs only when it justifies the time needed to do so. Examples when such  
868 markers can be of high value are in the construction of genetic linkage maps, even if multiple mapping  
869 populations are used [45], when they occur in a region of low coverage, or when they occur in a region  
870 of specific interest and help define additional alleles.

871

872 Very few other options exist to create a subset of high-quality genome-wide markers across pedigreed  
873 germplasm. GenomeStudio<sup>®</sup> does provide several quality scores that have been used before in SNP  
874 filtering, but no guidelines exist on what threshold values to use. Using parameter thresholds regularly  
875 reported in literature [26,53–56] (GenTrain Score > 0.7, 50GC Score > 0.4, ClusterSep Score > 0.25, Call  
876 Rate > 0.9, and Minor Freq > 0.01) on the current data, the proportion of retained, unreliable, or  
877 monomorphic SNPs would be 12.3%, 23.1%, and 6.7% in apple, peach, and sweet cherry, respectively,  
878 and a large proportion of good SNPs would be discarded (27.8%, 28.2%, and 7.6%, respectively). Thus,  
879 ASSiST greatly increased the number of reliable SNPs that were retained without reducing the quality of  
880 the subset of SNPs, making it the most efficient method to choose SNPs without prior knowledge on SNP  
881 performance.

882

883 Updating pedigree records

884 As thresholds to confirm or discard historic pedigree information depends on the germplasm,  
885 genotyping platform, and data quality, they need to be assessed case-wise. A custom R-script provided  
886 quick and easy determination of the number of PC and PPC errors. However, the custom code required a  
887 significant amount of time to identify possible parents when one or both parents were unknown,  
888 especially for larger data sets. Similar issues were observed for Cervus, which took a long time to run  
889 (days) and did identify some incorrect relationships, especially for inbred material. Cervus also requires a  
890 specific data format and we experienced some problems running the software for large data sets that  
891 were not immediately resolved. GenomeStudio® provided the quickest way to determine the number of  
892 PC and PPC errors, which could be determined immediately after loading the raw intensity data.  
893 However, new PC relationships could not automatically be determined and only SNPs retained by ASSiST  
894 should be used when using GenomeStudio® to determine the number of PC errors, to avoid inflating the  
895 number of PC errors. Therefore, we recommend using GenomeStudio® to confirm existing pedigree  
896 records when using Illumina arrays and using an R-script to determine new, previously unknown, PC  
897 relationships. Time-consuming analyses in R could be resolved by using a subset of markers equally  
898 spread across the genome. For confirming and identifying possible grandparent-grandchild relationships,  
899 we recommend the Excel template provided by van de Weg and co-workers (2018) [23]. However, this  
900 method can misconstrue aunts-uncles/nephew-nieces and individuals with other close relationships to  
901 the target individual as grandparents. Therefore, we recommend to only use this strategy when the user  
902 has a good understanding of the germplasm such as the origin of the material and the degree of  
903 inbreeding.

904

905 Individuals with only one parent known can still be used in a pedigree-based approach to find errors in  
906 the data set, although some errors might remain unnoticed. We recommend using the 'M\_' and 'F\_'



907 prefixes to the individual's name to designate the unknown mother or father, respectively. When it is  
908 unclear whether the unknown individual is the mother or the father, the 'UP\_' prefix can be used. Using  
909 this system instead of a non-descriptive name such as 'dummy 1' creates a clear connection between  
910 the individual with an unknown parent and the placeholder individual that is introduced. When the  
911 correct parent is later found, it also allows the quick replacement of the placeholder by the correct  
912 name (and corresponding genotypic data). Use of the same name for any missing parent should be  
913 avoided (e.g., using 'dummy' for all missing parents) unless the missing parent is unequivocally the  
914 parent of multiple individuals. If the same name is used incorrectly for multiple missing parents, the  
915 genotype of that single missing parent is expected by FlecQTL™ to be consistent with inheritance  
916 principles for all of its assigned offspring, potentially creating a large number of errors in further steps.

917

918 Although non-diploid individuals should be removed from the workflow before identifying reliable SNPs,  
919 they can have their pedigree checked if needed. Regardless of their ploidy, individuals should only  
920 contain alleles that are present in their parents. For example, a triploid individual with a marker call at  
921 one SNP of 'AAA' will be scored as 'AA', but can still not have a 'BB' parent. However, caution is advised  
922 as the grandparents through the parent that provided the unreduced gamete will also share a full allele  
923 set with any polyploid individual and thus these grandparents could also be incorrectly assigned as a  
924 parent of the polyploid individual. For example, the triploid 'Zonga' and its (diploid) grandparent 'Cox's  
925 Orange Pippin' share a full allele set (through an unreduced gamete of 'Alkmene') and thus no PC errors  
926 are reported [57]. However, only the combination of 'Delcorf' and 'Alkmene' could explain the  
927 genotypes of the triploid 'Zhonga' (AB+AA-AA test [23]). Thus, for triploids, not only do parents and  
928 offspring lead to no PC errors but some grandparents do as well, and the second parent is needed to  
929 identify the true PC relationship.

930

931 Creating or extending genetic maps.

932 This study used available genetic maps for apple and cherry (i.e., [20,21,45,47]), integrated them when  
933 needed, and used available physical information (from [44] and [46]) to add any markers that were not  
934 already mapped. Some of these added markers were positioned at chromosome ends, which resulted in  
935 the increase of the map size by 7 cM for apple. In addition, the orientation of apple chromosome 5 was  
936 inverted here to match the orientation of the latest genome version [44]. If no genetic map is available,  
937 one will need to be constructed alongside genotypic data curation. The need for a precise genetic  
938 position of markers on the 9K peach array prompted development of consensus linkage map for peach  
939 [58] that in the future could serve as a reference map to estimate genetic positions of unmapped  
940 markers. A mapping approach for pedigreed, multi-parental maps is described by Di Pierro and co-  
941 workers (2016) [45].

942

943 Resolving remaining Mendelian-inconsistent errors

944 Use of GenomeStudio® for detecting Mendelian-inconsistent errors is limited to Illumina array SNPs and  
945 cannot be used for other markers or haplotypes created in later steps of the workflow. In addition, some  
946 SNPs had their SNP scoring improved with ASSiST and manual curation, and thus the genotype scoring of  
947 GenomeStudio® might not reflect the actual data. Although this latter limitation is also true when  
948 confirming pedigree data, the few differences in genotype calls between GenomeStudio® and ASSiST are  
949 not expected to alter the outcome of pedigree confirmation. In contrast, when resolving single  
950 Mendelian-inconsistent errors, it is important to know that the error is indeed present in the data set.  
951 Although Cervus counts the number of Mendelian-inconsistent errors, it does not report which markers  
952 are causing issues for which individuals, making it impractical to use to remove the remaining PC and  
953 PPCerrors. In contrast to GenomeStudio®, FlexQTL™ can handle multiple allele formats and is thus  
954 suited for the curation of both SNP data and haplotype data. In addition, FlexQTL™ checks for

955 consistency over multiple generations, which enables detection of errors even if a genotype is missing in  
956 an intermediate individual. It also imputes missing data whenever possible. A disadvantage of FlexQTL™  
957 is that it only reports one of the two individuals, often the parent, for which an error occurred; it is then  
958 up to the user to find the second individual, often the offspring, involved in the Mendelian-inconsistent  
959 error. Therefore, we recommend using FlexQTL™ to identify Mendelian-inconsistent errors and  
960 resolving them with the help of GenomeStudio®.

961

#### 962 Using map and phasing information to detect Mendelian-consistent errors

963 FlexQTL™ performed very accurate phasing and only a few phasing issues were noticed. Most of these  
964 phasing issues were observed as double recombinations in offspring of an individual that served as a  
965 founder. The lack of parental info for this founder provided FlexQTL™ more freedom to phase alleles, as  
966 the phasing in the founder did not need to match its parents. Incorrect phasing was most likely caused  
967 by one or very few offspring for which a true recombination occurred in the map region. In those  
968 individuals, no double recombination occurred, and the incorrect phasing inferred by FlexQTL™  
969 minimized the interval over which the true recombination occurred. However, this minimalization of the  
970 recombination interval incorrectly specified where the recombination had occurred, causing incorrect  
971 phasing and resulting in one or multiple false double recombinations in full- and half-sibs of the  
972 individual(s) with the true recombination. Making genotype calls missing for the individual(s) with a  
973 recombination in that area enlarged the recombination interval for those individuals, but also led to  
974 correct phasing in their parent and resolved the supposed double recombinations in their full- and half-  
975 sibs. Very few other phasing issues were observed that could not be resolved on a single SNP level but  
976 were later resolved at the haploblock level. Thus, a small number of phasing issues can be accepted  
977 when moving forward to generating haploblocks and they could be nullified by FlexQTL™ by setting the  
978 parameter 'DeleteDR' to 1.

979

980 Haploblock and haplotype determination

981 Visual FlexQTL™ showed good accuracy (between 12% and 33% of the initial haploblocks had to be  
982 divided into additional haploblocks to avoid recombination within haploblocks for selected material) in  
983 determining haploblock borders based on historic recombination events. Two reasons exist for not  
984 identifying all historic recombinations for haploblock border determination. First, Visual FlexQTL™  
985 determines the border as the middle of the recombination interval. The more non-informative markers  
986 present in the recombination interval (due to homozygosity or lack of co-segregation (phase  
987 information), the less likely that the middle position is the true position of the historic recombination  
988 (which determines the haploblock border). Secondly, FlexQTL™ determines haploblock borders  
989 sequentially, starting with small recombination intervals; if multiple recombinations occur in the same  
990 region, one haploblock border could suffice to account for all recombinations. This approach thus  
991 minimizes the number of recombination sites needed to explain observed segregation data. In reality,  
992 the recombinations could have occurred between different markers, requiring that region to be split in  
993 additional haploblocks to avoid recombination within haploblocks for selected material.

994

995 PediHaplotyper's haplotypes did not always match with SNP data. In most cases, these inconsistencies  
996 were introduced during the marker consistency check with FlexQTL™ to ensure the haplotypes in an  
997 individual matched those of its parents and offspring. When the haplotype that caused the inconsistency  
998 was represented well in the pedigree, the haplotype was correct and the original genotype call for the  
999 SNP was incorrect. Thus, in these cases, haplotype curation identified additional errors in the SNP data.

1000 These errors were mostly caused by (very) small incorrectly identified genotype clusters or by single

1001 calling errors in the data set that were not detected earlier. When haplotypes in poorly represented

1002 individuals (one or two directly related individuals in the data set) showed an inconsistency with the SNP

1003 data, the SNP data was mostly correct and an error had occurred during haplotyping. The error could  
1004 span multiple generations leading to inconsistencies for multiple individuals but its impact on the  
1005 dataset was small as the overall representation of the incorrect haplotype was small. In the rare case  
1006 that a poor representation led to incorrect haplotype determination, the actual cause of the  
1007 inconsistency often remained unclear, but for some it was due to a recombination within a haploblock  
1008 for an un-genotyped ancestor or one of the direct parents of such an ancestor.

1009

1010 Haploblock borders are not fixed and can change based on the application of the final data set and the  
1011 germplasm used. For example, for QTL analyses some of the haploblocks defined here will be too large  
1012 as they span multiple cM; they will show within-haploblock recombination in numerous unselected  
1013 offspring thereby increasing the number of missing haplotype calls thus increasing uncertainty in QTL  
1014 position (including the widening of QTL intervals). Haploblock sizes can therefore be reduced to  
1015 minimize within haploblock recombination and better define QTL regions. However, when haploblocks  
1016 are very small, many haploblocks will consist of only one SNP or a few SNPs, increasing data sizes (and  
1017 thereby computation time in downstream analyses) and reducing the number of haplotypes per  
1018 haploblock, which can reduce the suitability of the data for visual examination. Unlike the 8K apple SNP  
1019 array, the 20K apple SNP array was designed to have clusters of multiple SNPs spread at approximately 1  
1020 cM intervals. A similar approach was used to create 9K add-ons for the 9K peach array and 6K cherry  
1021 array [59]. This strategy supports the generation of haploblocks consisting of SNPs aggregated within 1  
1022 cM intervals while still having multiple SNPs in a single haploblock and thus multiple informative  
1023 haplotypes.

1024

1025 Different germplasm will also lead to different haploblock borders. Currently, haploblocks are based on  
1026 historic recombination events representing the U.S. breeding programs included in this study. Other

1027 breeding programs or genetic studies might have other sets of founders and thus different  
1028 recombinations of relevance. Furthermore, the addition of new advanced selections and parents will  
1029 introduce new recombinations in their germplasm. Finally, as the understanding of the apple, peach,  
1030 and cherry germplasm increases, previously unknown progenitors, founders, and pedigree connections  
1031 will be discovered, also increasing the number of observed recombinations.

1032

1033 Given that haploblocking is performed at a relative late stage in the workflow, haploblock borders can  
1034 be altered without the need to redo all previously conducted pedigree and SNP marker curation. In fact,  
1035 existing haplotype data can be converted back to phased, fully curated SNP data which, in turn, can be  
1036 used to determine haplotypes for any set of haploblocks. As the SNPs are already phased and missing  
1037 SNP data was imputed based on the haplotypes, haplotype determination for new haploblock borders  
1038 should not create new genotyping errors in the data set. Once numbers of new recombinations are high  
1039 enough to justify updating of haploblock data, part of the haploblocks and their haplotypes should be  
1040 altered. PediHaplotyper supports the use of previous haplotype definitions for haploblocks that did not  
1041 change in composition. Adjusted haploblocks could be marked through their names, thus providing tools  
1042 to monitor new as well as previous, possibly well-known, marker alleles.

1043

1044 *The SNP classification system and integration of genotypic data for new germplasm into existing data*  
1045 *sets*

1046 The established SNP classification system enables the quick creation of a subset of SNPs that require  
1047 minimal or no data curation and provides a guideline on possible issues with other SNPs and how to  
1048 solve them. The system should help with the quick integration of new genotypic data into existing data  
1049 sets. Genotype calls for SNPs of type 1 and type 2 can be quickly integrated with high confidence in their  
1050 genotype calls. Where desired, SNPs of type 3, 4, and 5 can also be integrated, but additional curation

1051 would be required. Depending on germplasm tested, these SNPs might have incorrect genotype scoring  
1052 but their SNP type is an indication of why the genotype scoring is wrong and how to fix it. In other  
1053 germplasm, additional SNPs in the probe or null alleles might not be present, causing SNPs that are now  
1054 classified as type 4 or type 5 to give reliable results as if they were type 1 or type 2. Similarly, if  
1055 germplasm is used that is unrelated to that used here, type 1 and type 2 SNPs might show additional  
1056 clusters or null alleles and will require further curation. Finally, type 7 SNPs, which could not be mapped  
1057 in this germplasm, might be mapped and valuable for other germplasm.

1058

1059 The available reference data ([www.rosaceae.org](http://www.rosaceae.org)), combined with the SNP classification system, will  
1060 facilitate correct curation of additional genotypic data, even if the new germplasm is not directly  
1061 descended. The SNP genotype calls provided here are a reference for the genotype of each observed  
1062 genotype cluster in GenomeStudio®. In addition, SNP cluster coordinates of the latest GenomeStudio®  
1063 file can be imported into new projects, thus helping GenomeStudio® to correctly identify clusters.  
1064 Finally, the use of reference iScan data is especially useful for markers that have only two of the three  
1065 clusters in a new project but all three clusters were defined in the current reference dataset. By adding  
1066 reference iScan data into the new project, all three clusters will be available, ensuring correct  
1067 automated genotype calling. Therefore, we recommend including available reference data when  
1068 obtaining genotype calls for new germplasm.

1069

#### 1070 Data curation in apple

1071 The need for SNP data curation in apple was increased by the whole genome duplication in the  
1072 evolutionary history of apple, the relatively poorer quality of the first genome draft used for  
1073 development of the 8K SNP array, and unidentified polymorphisms in the probe regions during SNP  
1074 array design. The genome duplication resulted in presence of multiple highly similar sequences on

1075 different chromosomes. Indeed, a BLAST analysis against *Malus* genome v1.0 of the first 24 nucleotides  
1076 of the 3' region of arrayed SNP probes, which is most important for probe binding, showed that  
1077 approximately 50% of the sequences returned multiple hits with almost all of these hits being located on  
1078 multiple LGs [33]. This proportion is expected to be lower for the latest genome version [44] as most  
1079 errors in assembly were removed but the proportion is expected to remain high due to chromosome  
1080 and gene duplication observed in apple. Where two genomic regions are targeted by the same probe,  
1081 complex cluster plots will occur if more than one of the targeted loci segregate within a single family.  
1082 Such markers must be excluded from a curated data set. Multi-target markers might still be robust if  
1083 they segregate at only one locus. In this case, only the cluster plot space is reduced (mostly halved),  
1084 causing clusters to be located more closely to each other. In turn, this might occasionally cause  
1085 separation issues. Also, some markers are lost because GenomeStudio® cannot assign genotype calls for  
1086 markers where one of the homozygous clusters is located at  $\theta=0.5$ , the center of the x-axis, and thus  
1087 these markers are considered by the software to have failed. . A special case for two-locus markers  
1088 occurs where each locus segregates in specific families but both loci never segregate together in the  
1089 same family. In this case, genotype scoring might be performed accurately, and the SNP still needs to be  
1090 present twice in the map although under different names. Two- and three-locus SNPs have been  
1091 successfully mapped in the multi-family based genetic linkage map created by Di Pierro and co-workers  
1092 (2016) [45]. However, in subsequent QTL mapping studies on pedigreed germplasm, such markers were  
1093 excluded, as in the current study.

1094

1095 Several intermediate progenitors in the apple data set lacked any genotypic data and therefore the  
1096 recorded link between some important breeding parents and their ancestors had to be set to unknown  
1097 during haploblock and haplotype determination. For some progenitors, 20K data from the European  
1098 FruitBreedomics project was available that reestablished the connection between genotyped individuals



1099 and their ancestors, but many other progenitors likely no longer exist. Individuals that were  
1100 disconnected from the pedigree with little representation could not therefore have their haplotypes  
1101 accurately determined using PediHaplotyper. It was, however, possible to manually determine their  
1102 haplotypes based on their SNP data and haplotypes present in disconnected relatives.

1103

#### 1104 *Data curation in peach*

1105 In peach, the most challenging step in the workflow was the curation of pedigree information over nine  
1106 generations. Although much pedigree information is available in the literature [60], we identified  
1107 incorrect parentage in the PC error analysis in cultivars and breeding selections, which we attributed to  
1108 selfing or outcrossing. Incorrect pedigree records were previously reported in the UC Davis processing  
1109 peach breeding program in approximately 20% of individuals, both parental and breeding selections  
1110 [16]. In this work, we identified incorrect parentage in approximately 11% of the pedigree records from  
1111 the three fresh market peach breeding programs, most of which were observed in breeding selections.  
1112 High level of inbreeding and coancestry in the U.S cultivated peach germplasm [61] creates overlap in  
1113 the ancestral generations of most U.S. peach breeding programs. Therefore, corrections in the ancestral  
1114 pedigree records reported by Fresnedo-Ramírez and co-workers (2015) [16] reduced the number of  
1115 errors detected here. Furthermore, intermediate parents were unavailable for genotyping, so pedigree  
1116 connections were preserved by retaining pedigree information even though many intermediate  
1117 progenitors were not genotyped. Finally, the presence of missing data within a haplotype resulted in  
1118 Mendelian-inconsistent errors in the haploblock and haplotype generation steps, which made the  
1119 haploblock data curation time-consuming.

1120

1121

1122

1123 Data curation in sweet cherry

1124 For the sweet cherry germplasm, the most challenging issue was the small sample size of some families  
1125 (as few as four individuals), which were too small for FlexQTL™ to accurately determine linkage phase.  
1126 For parents with just one genotyped offspring, phasing of the parent homologs was considered putative  
1127 as recombination inherited by offspring could not be determined. For those parents with just two  
1128 genotyped offspring, recombinations were arbitrarily assigned between the two offspring, as the true  
1129 recombinant offspring could not be determined. In addition, scarce information on pedigrees in  
1130 ancestral generations beyond about five limited further imputations in data curation, unlike for apple  
1131 and peach. Various founders showed extensive regions of common haplotypes, indicating a high degree  
1132 of relatedness among such founders. Some recently published haplotyping results exemplify this for the  
1133 founders ‘Black Republican’ and ‘Napoleon’ [21]. Unraveling the unknown relationships among founders  
1134 could thus provide useful information for future data curation in sweet cherry.

1135

1136 Expectations for other crops

1137 The proposed workflow could be applied to other diploid crops with similar breeding systems where  
1138 clonally propagated relatives of current breeding material still exist. However, there are additional  
1139 aspects that would need to be considered in certain circumstances that were not encountered in the  
1140 present study. First, this workflow makes the assumption that there are no differences in the true SNP  
1141 map order among individuals of a species. In interspecific crosses where there can be differences in  
1142 chromosome arrangements between parental species, the different SNP order or indel variation among  
1143 individuals could result in additional perceived double recombinations or other difficulties in following  
1144 this workflow. Additionally, this workflow assumes that there is sufficient marker information to  
1145 correctly identify pedigree relationships and assumes sufficient segregation information for validating  
1146 marker order and identifying Mendelian-consistent errors. When using highly homozygous, inbred

1147 individuals, there might be too few segregating markers available to correctly identify marker order or  
1148 find Mendelian-consistent errors through double recombinations. Also, for small germplasm sets, too  
1149 few recombinations might be available to detect incorrect marker order. Finally, the prevalence of  
1150 missing genotypic values should be sufficiently low across individuals. Unlike the SNP arrays used in this  
1151 study, some genotyping methods such as Genotyping-by-Sequencing do not consistently target specific  
1152 loci. This non-specificity can increase the flexibility of their use, but also raises new issues for which the  
1153 current workflow would have to be adapted, including the potential decrease in accuracies of  
1154 genotyping and haploblock determination due to unbalanced representation of genotyped loci, high  
1155 levels of missing data, and sequencing errors.

1156

1157 *High-quality archived SNP and haplotype data sets*

1158 The presented genome-wide genotypic data sets for apple, peach, and sweet cherry are of very high  
1159 quality, are composed of genetically complex germplasm, and contain no errors that could be  
1160 determined based on pedigree information. This high quality provides confidence in the results of  
1161 downstream analyses. Such confidence is important as many of these results are expected to lead to  
1162 fundamental discoveries and practical breeding application. The iScan data, phased SNP, and haplotype  
1163 datasets of individuals in the apple, peach, and sweet cherry crop reference sets are available through  
1164 the Genome Database for Rosaceae ([www.rosaceae.org](http://www.rosaceae.org)).

1165

1166 Marker and pedigree data from germplasm subsets of the current U.S. RosBREED project, the EU-  
1167 FruitBreedomics project, and other research projects have previously been curated by a precursor to the  
1168 current workflow and used for the creation of a multi-family based genetic linkage maps [20,45] and in  
1169 multifamily based QTL studies in apple [62–65], peach [22,66], and sweet cherry [14]. Also, elements of  
1170 the workflow were used for allo-octoploid strawberry to curate Axiom-based SNP markers [31] and

1171 pedigree data that were subsequently used in multi-family based QTL analyses [67–69]. While providing  
1172 high-quality data for each analysis separately, these earlier steps in data curation have helped guide and  
1173 streamline the data curation workflow presented here. The current workflow and resulting data sets  
1174 ensure that the same curation steps have been used across the data sets of multiple crops and that the  
1175 data sets are of the same high quality.

1176

## 1177 **Conclusion**

1178 A curation workflow for genotypic data of pedigreed germplasm was generated by determining the  
1179 optimal order of resolving issues and by providing a step-by-step guideline. Using simple genetic  
1180 principles, errors can be found and curated in a directed and efficient way, reducing the time needed to  
1181 obtain a high-quality genotypic data set. The workflow was used to obtain a SNP data set for large  
1182 germplasm sets for each of apple, peach, and sweet cherry representing U.S. breeding programs based  
1183 on the apple 8K SNP array, peach 9K SNP array, and cherry 6K SNP array, respectively, whose SNP data is  
1184 available through this paper ([www.rosaceae.org](http://www.rosaceae.org)), as well as used on apple and peach germplasm sets  
1185 representing European breeding programs based on the apple 20K and peach 9K arrays, whose SNP data  
1186 are still private. These high-quality data sets contain the largest sets of SNPs obtained through their  
1187 respective SNP arrays and will provide the foundation for confident subsequent analyses in genetic  
1188 research.

1189

## 1190 **Acknowledgements**

1191 The authors want to thank Jasper Rees (Agricultural Research Council, South Africa) for his help in  
1192 genotyping apple samples. This work was funded by the USDA-NIFA-Specialty Crop Research Initiative  
1193 projects, RosBREED: Enabling marker-assisted breeding in Rosaceae (2009-51181-05808), RosBREED 2:  
1194 Combining disease resistance with horticultural quality in new rosaceous cultivars (2014-51181-22378),

1195 USDA NIFA Hatch projects 0211277 and 1014919, and the FruitBreedomics project No 265582:  
1196 Integrated approach for increasing breeding efficiency in fruit tree crops ([www.FruitBreedomics.com](http://www.FruitBreedomics.com))  
1197 that was co-funded by the EU seventh Framework Programme.

1198

1199 **Supplementary information**

1200 **Table S1:** Apple germplasm genotyped and used for data curation workflow. Individuals are split over  
1201 the publicly available RosBREED Crop Reference Set, three privately held RosBREED Breeding Pedigree  
1202 Sets, and genotypic data received from either KULeuven (Belgium) or the FruitBreedomics project.  
1203 Except for the Breeding Pedigree sets, curated pedigree information is given for each individual. For  
1204 each individual, the type of material (selected vs. unselected), the location of sampling, quality of the  
1205 results, and inferred ploidy of the sample are given. For unselected seedlings, the family to which they  
1206 belong is also given. For the Breeding Pedigree Sets, this information is summarized per full-sib family. If  
1207 tissue was collected at the USDA germplasm repository in Geneva, a GRIN accession number is also  
1208 provided. Parents highlighted in yellow did not have genotypic data and their pedigree-relationships  
1209 could not be tested.

1210

1211 **Table S2:** Peach germplasm genotyped and used for curation workflow. Individuals are split over the  
1212 publicly available RosBREED Crop Reference Set and three privately held RosBREED Breeding Pedigree  
1213 Sets. Except for the Breeding Pedigree Sets, curated pedigree information is given for each individual.  
1214 For each individual, the type of material (selected vs. unselected), the location of sampling, and quality  
1215 of the results of the sample are given. For unselected seedlings, the family to which they belong is also  
1216 given. For the Breeding Pedigree Sets, this information is summarized per full-sib family.

1217

1218 **Table S3:** Sweet cherry germplasm genotyped and used for curation workflow. All individuals are part of  
1219 the publicly available RosBREED Crop Reference Set. For each individual, curated pedigree information,  
1220 the type of material (selected vs. unselected), the location of sampling, and quality of the results of the  
1221 sample are given. For unselected seedlings, the family to which they belong is also given.

1222

1223 **Table S4:** Parameter settings used for (A) filtering SNPs used in analyses of B-allele frequency, (B)  
1224 running ASSiST, (C) running FlexQTL™ for detecting Mendelian-inconsistent errors and Mendelian-  
1225 consistent errors, and (D) running FlexQTL™ for phasing, haploblock determination, and creating  
1226 PediHaplotyper input files.

1227

1228 **Table S5:** Final genetic map used for apple during data curation. For each marker, genetic position,  
1229 associated haploblock, and physical position based on the apple GDDH 13 v1.1 genome are given.

1230

1231 **Table S6:** Final genetic map used for peach during data curation. For each marker, genetic position,  
1232 associated haploblock, and physical position based on the peach v2 genome are given.

1233

1234 **Table S7:** Final genetic map used for sweet cherry during data curation. For each marker, genetic  
1235 position, associated haploblock, and physical position based on the peach v2 genome are given.

1236

1237 **Table S8:** SNP classification for apple. Each SNP is classified as follows: Type '1' for SNPs with good  
1238 clustering and less than 5% call errors, '2' for SNPs with shifted clusters causing one of the clusters to be  
1239 called incorrectly, '3' for SNPs with additional clusters (excluding null-alleles) that cause the incorrect  
1240 identification of at least one cluster, '4' for SNPs with null-alleles that cannot be correctly called

1241 automatically, '5' for SNPs that could not be mapped accurately but had correct clustering, '6' for  
1242 monomorphic SNPs, and '7' for failed SNPs.

1243

1244 **Table S9:** SNP classification for peach. Each SNP is classified as follows: Type '1' for SNPs with good  
1245 clustering and less than 5% call errors, '2' for SNPs with shifted clusters causing one of the clusters to be  
1246 called incorrectly, '3' for SNPs with additional clusters (excluding null-alleles) that cause the incorrect  
1247 identification of at least one cluster, '4' for SNPs with null-alleles that cannot be correctly called  
1248 automatically, '5' for SNPs that could not be mapped accurately but had correct clustering, '6' for  
1249 monomorphic SNPs, and '7' for failed SNPs.

1250

1251 **Table S10:** SNP classification for sweet cherry. Each SNP is classified as follows: Type '1' for SNPs with  
1252 good clustering and less than 5% call errors, '2' for SNPs with shifted clusters causing one of the clusters  
1253 to be called incorrectly, '3' for SNPs with additional clusters (excluding null-alleles) that cause the  
1254 incorrect identification of at least one cluster, '4' for SNPs with null-alleles that cannot be correctly  
1255 called automatically, '5' for SNPs that could not be mapped accurately but had correct clustering, '6' for  
1256 monomorphic SNPs, and '7' for failed SNPs.

1257

1258 **Figure S1:** SNP B-allele frequencies plotted against physical position in the genome for (A) triploid  
1259 individuals excluding 'Jonagold', and (B) individuals with a tetraploid pattern

1260

1261 **Figure S2:** Call rates observed for individuals classified as having good, intermediate, or bad quality of  
1262 genotypic data as defined by their B-allele frequency plot outcome. Higher call rates are observed for  
1263 individuals with better quality of genotypic data.

1264

1265 **Document S1:** R-script used to create B-allele frequency plots for all genotyped individuals.

1266

1267 **Document S2:** R-scripts used to confirm and deduce P(P)C relationships.

1268

1269 **Document S3:** Hands-on guideline on how to perform data curation using the steps described in this

1270 study

1271

## 1272 **References**

- 1273 1. Pompanon F, Bonin A, Bellemain E, Taberlet P. Genotyping errors: causes, consequences and  
1274 solutions. *Nat Rev Genet.* 2005;6: 847–859. doi:10.1038/nrg1707
- 1275 2. Buetow KH. Influence of aberrant observations on high-resolution linkage analysis outcomes. *Am J*  
1276 *Hum Genet.* 1991;49: 985–994.
- 1277 3. Goldstein DR, Zhao H, Speed TP. The effects of genotyping errors and interference on estimation of  
1278 genetic distance. *Hum Hered.* 1997;47: 86–100. doi:10.1159/000154396
- 1279 4. Hackett CA, Broadfoot LB. Effects of genotyping errors, missing values and segregation distortion  
1280 in molecular marker data on the construction of linkage maps. *Heredity.* 2003;90: 33–38.  
1281 doi:10.1038/sj.hdy.6800173
- 1282 5. Abecasis GR, Cherny SS, Cardon LR. The impact of genotyping error on family-based analysis of  
1283 quantitative traits. *European Journal of Human Genetics.* 2001;9: 130–134.  
1284 doi:10.1038/sj.ejhg.5200594
- 1285 6. Gordon D, Finch SJ, Nothnagel M, Ott J. Power and sample size calculations for case-control  
1286 genetic association tests when errors are present: application to single nucleotide polymorphisms.  
1287 *Hum Hered.* 2002;54: 22–33. doi:10.1159/000066696
- 1288 7. Browning BL, Yu Z. Simultaneous genotype calling and haplotype phasing improves genotype  
1289 accuracy and reduces false-positive associations for genome-wide association studies. *Am J Hum*  
1290 *Genet.* 2009;85: 847–861. doi:10.1016/j.ajhg.2009.11.004
- 1291 8. Terwilliger J, Weeks D, Ott J. Laboratory errors in the reading of marker alleles cause massive  
1292 reductions in LOD score and lead to gross overestimates of the recombination fraction. *Am J Hum*  
1293 *Genet.* 1990;47: A201.
- 1294 9. Kirk KM, Cardon LR. The impact of genotyping error on haplotype reconstruction and frequency  
1295 estimation. *Eur J Hum Genet.* 2002;10: 616–622. doi:10.1038/sj.ejhg.5200855



- 1296 10. Cheung CYK, Thompson EA, Wijsman EM. Detection of Mendelian consistent genotyping errors in  
1297 pedigrees. *Genet Epidemiol.* 2014;38: 291–299. doi:10.1002/gepi.21806
- 1298 11. Vouillamoz JF, Grando MS. Genealogy of wine grape cultivars: “Pinot” is related to “Syrah.”  
1299 *Heredity (Edinb).* 2006;97: 102–110. doi:10.1038/sj.hdy.6800842
- 1300 12. Evans KM, Patocchi A, Rezzonico F, Mathis F, Durel CE, Fernández-Fernández F, et al. Genotyping  
1301 of pedigreed apple breeding material with a genome-covering set of SSRs: trueness-to-type of  
1302 cultivars and their parentages. *Mol Breeding.* 2011;28: 535–547. doi:10.1007/s11032-010-9502-5
- 1303 13. Lacombe T, Boursiquot J-M, Laucou V, Di Vecchi-Staraz M, Péros J-P, This P. Large-scale parentage  
1304 analysis in an extended set of grapevine cultivars (*Vitis vinifera* L.). *Theor Appl Genet.* 2013;126:  
1305 401–414. doi:10.1007/s00122-012-1988-2
- 1306 14. Rosyara UR, Sebolt AM, Peace C, Iezzoni AF. Identification of the paternal parent of ‘Bing’ sweet  
1307 cherry and confirmation of descendants using single nucleotide polymorphism markers. *J Amer Soc  
1308 Hort Sci.* 2014;139: 148–156.
- 1309 15. Pikunova A, Madduri M, Sedov E, Noordijk Y, Peil A, Troggio M, et al. ‘Schmidt’s Antonovka’ is  
1310 identical to ‘Common Antonovka’, an apple cultivar widely used in Russia in breeding for biotic and  
1311 abiotic stresses. *Tree Genetics & Genomes.* 2014;10: 261–271. doi:10.1007/s11295-013-0679-8
- 1312 16. Fresnedo-Ramírez J, Crisosto CH, Gradziel TM, Famula TR. Pedigree correction and estimation of  
1313 breeding values for peach genetic improvement. *Acta Horticulturae.* 2015;1084: 249–256.  
1314 doi:10.17660/ActaHortic.2015.1084.35
- 1315 17. Fresnedo-Ramírez J, Frett TJ, Sandefur PJ, Salgado-Rojas A, Clark JR, Gasic K, et al. QTL mapping  
1316 and breeding value estimation through pedigree-based analysis of fruit size and weight in four  
1317 diverse peach breeding programs. *Tree Genetics & Genomes.* 2016;12: 25. doi:10.1007/s11295-  
1318 016-0985-z
- 1319 18. Lassois L, Denancé C, Ravon E, Guyader A, Guisnel R, Hibrand-Saint-Oyant L, et al. Genetic  
1320 diversity, population structure, parentage analysis, and construction of core collections in the  
1321 French apple germplasm based on SSR markers. *Plant Mol Biol Rep.* 2016;34: 827–844.  
1322 doi:10.1007/s11105-015-0966-7
- 1323 19. Larsen B, Toldam-Andersen TB, Pedersen C, Ørgaard M. Unravelling genetic diversity and cultivar  
1324 parentage in the Danish apple gene bank collection. *Tree Genetics & Genomes.* 2017;13: 14.  
1325 doi:10.1007/s11295-016-1087-7
- 1326 20. Howard NP, van de Weg E, Bedford DS, Peace CP, Vanderzande S, Clark MD, et al. Elucidation of  
1327 the ‘Honeycrisp’ pedigree through haplotype analysis with a multi-family integrated SNP linkage  
1328 map and a large apple (*Malus domestica*) pedigree-connected SNP data set. *Horticulture  
1329 Research.* 2017;4: 17003. doi:10.1038/hortres.2017.3
- 1330 21. Cai L, Voorrips RE, van de Weg E, Peace C, Iezzoni A. Genetic structure of a QTL hotspot on  
1331 chromosome 2 in sweet cherry indicates positive selection for favorable haplotypes. *Mol Breeding.*  
1332 2017;37: 85. doi:10.1007/s11032-017-0689-6

- 1333 22. Hernández Mora JR, Micheletti D, Bink MAM, Van de Weg WE, Bassi D, Nazzicari N, et al.  
1334 Discovering peach QTLs with multiple progeny analysis. *Acta Horticulturae*. 2017;1172: 405–410.  
1335 doi:10.17660/ActaHortic.2017.1172.77
- 1336 23. van de Weg E, Di Guardo M, Jänsch M, Socquet-Juglard D, Costa F, Baumgartner I, et al. Epistatic  
1337 fire blight resistance QTL alleles in the apple cultivar ‘Enterprise’ and selection X-6398 discovered  
1338 and characterized through pedigree-informed analysis. *Mol Breeding*. 2018;38: 5.  
1339 doi:10.1007/s11032-017-0755-0
- 1340 24. Xu X, Bai G. Whole-genome resequencing: changing the paradigms of SNP detection, molecular  
1341 mapping and gene discovery. *Mol Breeding*. 2015;35: 33. doi:10.1007/s11032-015-0240-6
- 1342 25. Rasheed A, Hao Y, Xia X, Khan A, Xu Y, Varshney RK, et al. Crop breeding chips and genotyping  
1343 platforms: progress, challenges, and perspectives. *Mol Plant*. 2017;10: 1047–1064.  
1344 doi:10.1016/j.molp.2017.06.008
- 1345 26. Chagné D, Crowhurst RN, Troggio M, Davey MW, Gilmore B, Lawley C, et al. Genome-wide SNP  
1346 detection, validation, and development of an 8K SNP array for apple. *PLOS ONE*. 2012;7: e31745.  
1347 doi:10.1371/journal.pone.0031745
- 1348 27. Verde I, Bassil N, Scalabrin S, Gilmore B, Lawley CT, Gasic K, et al. Development and evaluation of a  
1349 9K SNP array for peach by internationally coordinated SNP detection and validation in breeding  
1350 germplasm. *PLOS ONE*. 2012;7: e35668. doi:10.1371/journal.pone.0035668
- 1351 28. Peace C, Bassil N, Main D, Ficklin S, Rosyara UR, Stegmeir T, et al. Development and evaluation of a  
1352 genome-wide 6K SNP array for diploid sweet cherry and tetraploid sour cherry. *PLOS ONE*. 2012;7:  
1353 e48305. doi:10.1371/journal.pone.0048305
- 1354 29. Le Paslier M-C, Choisne N, Bacilieri R, Bounon R, Boursiquot J-M, Bras M, et al. The GrapeReSeq  
1355 18K *Vitis* genotyping chip. 9th International symposium grapevine physiology and biotechnology.  
1356 La Serena, Chili; 2013. p. 123.
- 1357 30. Bianco L, Cestaro A, Sargent DJ, Banchi E, Derdak S, Guardo MD, et al. Development and validation  
1358 of a 20K single nucleotide polymorphism (SNP) whole genome genotyping array for apple (*Malus ×*  
1359 *domestica* Borkh). *PLOS ONE*. 2014;9: e110377. doi:10.1371/journal.pone.0110377
- 1360 31. Bassil NV, Davis TM, Zhang H, Ficklin S, Mittmann M, Webster T, et al. Development and  
1361 preliminary evaluation of a 90K Axiom® SNP array for the allo-octoploid cultivated strawberry  
1362 *Fragaria × ananassa*. *BMC Genomics*. 2015;16: 155. doi:10.1186/s12864-015-1310-1
- 1363 32. Bianco L, Cestaro A, Linsmith G, Muranty H, Denancé C, Théron A, et al. Development and  
1364 validation of the Axiom® Apple 480K SNP genotyping array. *Plant J*. 2016;86: 62–74.  
1365 doi:10.1111/tbj.13145
- 1366 33. Troggio M, Šurbanovski N, Bianco L, Moretto M, Giongo L, Banchi E, et al. Evaluation of SNP data  
1367 from the *Malus* Infinium array identifies challenges for genetic analysis of complex genomes of  
1368 polyploid origin. *PLOS ONE*. 2013;8: e67407. doi:10.1371/journal.pone.0067407

- 1369 34. Di Guardo M, Micheletti D, Bianco L, Koehorst-van Putten HJJ, Longhi S, Costa F, et al. ASSIsT: an  
1370 automatic SNP scoring tool for in- and outbreeding species - Reference Manual. 2015.
- 1371 35. Di Guardo M, Micheletti D, Bianco L, Koehorst-van Putten HJJ, Longhi S, Costa F, et al. ASSIsT: an  
1372 automatic SNP scoring tool for in- and outbreeding species. *Bioinformatics*. 2015;31: 3873–3874.  
1373 doi:10.1093/bioinformatics/btv446
- 1374 36. Voorrips RE, Bink MCAM, Kruisselbrink JW, Koehorst-van Putten HJJ, van de Weg WE.  
1375 *PediHaplotyper*: software for consistent assignment of marker haplotypes in pedigrees. *Mol Breed*.  
1376 2016;36. doi:10.1007/s11032-016-0539-y
- 1377 37. Iezzoni A, Weebadde C, Luby J, Chengyan Yue, van de Weg E, Fazio G, et al. Rosbreed: enabling  
1378 marker-assisted breeding in *Rosaceae*. *Acta Horticulturae*. 2010;859: 389–394.  
1379 doi:10.17660/ActaHortic.2010.859.47
- 1380 38. Iezzoni A, Weebadde C, Peace C, Main D, Bassil NV, Coe M, et al. Where are we now as we merge  
1381 genomics into plant breeding and what are our limitations? Experiences from RosBREED. *Acta*  
1382 *Horticulturae*. 2016;1117: 1–5. doi:10.17660/ActaHortic.2016.1117.1
- 1383 39. Iezzoni A, Peace C, Main D, Bassil N, Coe M, Finn C, et al. RosBREED2: progress and future plans to  
1384 enable DNA-informed breeding in the *Rosaceae*. *Acta Horticulturae*. 2017;1172: 115–118.  
1385 doi:10.17660/ActaHortic.2017.1172.20
- 1386 40. Laurens F, Durel C-E, Patocchi A, Peil A, Salvi S, Tartarini S, et al. Review on apple genetics and  
1387 breeding programs and presentation of a new initiative of a new European initiative to increase  
1388 fruit breeding efficiency. *Journal of Fruit Science*. 2010;27: 102–107.
- 1389 41. Laurens F, Aranzana MJ, Arús P, Bassi D, Bonany J, Corelli L, et al. Review of fruit genetics and  
1390 breeding programmes and a new European initiative to increase fruit breeding efficiency. *Acta*  
1391 *Horticulturae*. 2012;929: 95–102. doi:10.17660/ActaHortic.2012.929.12
- 1392 42. Laurens F, Aranzana MJ, Arus P, Bassi D, Bink M, Bonany J, et al. An integrated approach for  
1393 increasing breeding efficiency in apple and peach in Europe. *Hortic Res*. 2018;5: 11.  
1394 doi:10.1038/s41438-018-0016-3
- 1395 43. Peace CP, Luby JJ, van de Weg WE, Bink MCAM, Iezzoni AF. A strategy for developing  
1396 representative germplasm sets for systematic QTL validation, demonstrated for apple, peach, and  
1397 sweet cherry. *Tree Genetics & Genomes*. 2014;10: 1679–1694. doi:10.1007/s11295-014-0788-z
- 1398 44. Daccord N, Celton J-M, Linsmith G, Becker C, Choisne N, Schijlen E, et al. High-quality de novo  
1399 assembly of the apple genome and methylome dynamics of early fruit development. *Nat Genet*.  
1400 2017;49: 1099–1106. doi:10.1038/ng.3886
- 1401 45. Di Pierro EA, Gianfranceschi L, Di Guardo M, Koehorst-van Putten HJ, Kruisselbrink JW, Longhi S, et  
1402 al. A high-density, multi-parental SNP genetic map on apple validates a new mapping approach for  
1403 outcrossing species. *Horticulture Research*. 2016;3: 16057. doi:10.1038/hortres.2016.57

- 1404 46. Verde I, Jenkins J, Dondini L, Micali S, Pagliarani G, Vendramin E, et al. The Peach v2.0 release:  
1405 high-resolution linkage mapping and deep resequencing improve chromosome-scale assembly and  
1406 contiguity. *BMC Genomics*. 2017;18: 225. doi:10.1186/s12864-017-3606-9
- 1407 47. Klagges C, Campoy JA, Quero-García J, Guzmán A, Mansur L, Gratacós E, et al. Construction and  
1408 comparative analyses of highly dense linkage maps of two sweet cherry intra-specific progenies of  
1409 commercial cultivars. *PLOS ONE*. 2013;8: e54743. doi:10.1371/journal.pone.0054743
- 1410 48. Chagné D, Kirk C, Whitworth C, Erasmuson S, Bicknell R, Sargent DJ, et al. Polyploid and aneuploid  
1411 detection in apple using a single nucleotide polymorphism array. *Tree Genetics & Genomes*.  
1412 2015;11: 94. doi:10.1007/s11295-015-0920-8
- 1413 49. R Core Team. R: A Language and Environment for Statistical Computing [Internet]. Vienna, Austria:  
1414 R Foundation for Statistical Computing; 2018. Available: <http://www.R-project.org/>
- 1415 50. Purcell S, Neale B, Todd-Brown K, Thomas L, Ferreira MAR, Bender D, et al. PLINK: a tool set for  
1416 whole-genome association and population-based linkage analyses. *Am J Hum Genet*. 2007;81:  
1417 559–575. doi:10.1086/519795
- 1418 51. Kalinowski ST, Taper ML, Marshall TC. Revising how the computer program CERVUS  
1419 accommodates genotyping error increases success in paternity assignment. *Mol Ecol*. 2007;16:  
1420 1099–1106. doi:10.1111/j.1365-294X.2007.03089.x
- 1421 52. Young ND, Tanksley SD. Restriction fragment length polymorphism maps and the concept of  
1422 graphical genotypes. *Theoret Appl Genetics*. 1989;77: 95–101. doi:10.1007/BF00292322
- 1423 53. Namjou B, Sestak AL, Armstrong DL, Zidovetzki R, Kelly JA, Jacob N, et al. High-density genotyping  
1424 of *STAT4* reveals multiple haplotypic associations with systemic lupus erythematosus in different  
1425 racial groups. *Arthritis Rheum*. 2009;60: 1085–1095. doi:10.1002/art.24387
- 1426 54. Jacob CO, Zhu J, Armstrong DL, Yan M, Han J, Zhou XJ, et al. Identification of *IRAK1* as a risk gene  
1427 with critical role in the pathogenesis of systemic lupus erythematosus. *Proc Natl Acad Sci USA*.  
1428 2009;106: 6256–6261. doi:10.1073/pnas.0901181106
- 1429 55. Kumar S, Chagné D, Bink MCAM, Volz RK, Whitworth C, Carlisle C. Genomic selection for fruit  
1430 quality traits in apple (*Malus domestica* Borkh.). *PLOS ONE*. 2012;7: e36674.  
1431 doi:10.1371/journal.pone.0036674
- 1432 56. Guo Y, He J, Zhao S, Wu H, Zhong X, Sheng Q, et al. Illumina human exome genotyping array  
1433 clustering and quality control. *Nat Protoc*. 2014;9: 2643–2662. doi:10.1038/nprot.2014.174
- 1434 57. Vanderzande S, Micheletti D, Troggio M, Davey MW, Keulemans J. Genetic diversity, population  
1435 structure, and linkage disequilibrium of elite and local apple accessions from Belgium using the  
1436 IRSC array. *Tree Genetics & Genomes*. 2017;13: 125. doi:10.1007/s11295-017-1206-0
- 1437 58. da Silva Linge C, Antanaviciute L, Abdelghafar A, Arús P, Bassi D, Rossini L, et al. High-density multi-  
1438 population consensus genetic linkage map for peach. *PLOS ONE*. 2018;13: e0207724.  
1439 doi:10.1371/journal.pone.0207724

- 1440 59. Vanderzande S, Zheng P, Cai L, Iezzoni A, Main D, Peace C. Development and initial assessment of  
1441 the 9K SNP addition to the sweet and sour cherry genome-wide SNP array. San Diego, CA, USA;  
1442 2019.
- 1443 60. Okie WR. Handbook of peach and nectarine varieties: performance in the southeastern United  
1444 States and index of names. U.S. Dept. of Agriculture, Agricultural Research Service; 1998.
- 1445 61. Scorza R, Sherman W. Peaches. In: Janick J, Moore J, editors. Fruit Breeding. New York: Wiley;  
1446 1996. pp. 325–440.
- 1447 62. Allard A, Bink MCAM, Martinez S, Kelner J-J, Legave J-M, di Guardo M, et al. Detecting QTLs and  
1448 putative candidate genes involved in budbreak and flowering time in an apple multiparental  
1449 population. J Exp Bot. 2016;67: 2875–2888. doi:10.1093/jxb/erw130
- 1450 63. Di Guardo M, Bink MCAM, Guerra W, Letschka T, Lozano L, Busatto N, et al. Deciphering the  
1451 genetic control of fruit texture in apple by multiple family-based analysis and genome-wide  
1452 association. J Exp Bot. 2017;68: 1451–1466. doi:10.1093/jxb/erx017
- 1453 64. Durand J-B, Allard A, Guitton B, van de Weg E, Bink MCAM, Costes E. Predicting flowering behavior  
1454 and exploring its genetic determinism in an apple multi-family population based on statistical  
1455 indices and simplified phenotyping. Front Plant Sci. 2017;8: 858. doi:10.3389/fpls.2017.00858
- 1456 65. Verma S, Evans K, Guan Y, Luby JJ, Rosyara UR, Howard NP, et al. Two large-effect QTLs, Ma and  
1457 Ma3, determine genetic potential for acidity in apple fruit: Breeding insights from a multi-family  
1458 study. Tree Genetics & Genomes. 2019; *in press*.
- 1459 66. Hernández Mora JR, Micheletti D, Bink M, Van de Weg E, Cantín C, Nazzicari N, et al. Integrated  
1460 QTL detection for key breeding traits in multiple peach progenies. BMC Genomics. 2017;18: 404.  
1461 doi:10.1186/s12864-017-3783-6
- 1462 67. Roach JA, Verma S, Peres NA, Jamieson AR, van de Weg WE, Bink MCAM, et al. FaRXf1: a locus  
1463 conferring resistance to angular leaf spot caused by *Xanthomonas fragariae* in octoploid  
1464 strawberry. Theor Appl Genet. 2016;129: 1191–1201. doi:10.1007/s00122-016-2695-1
- 1465 68. Mangandi J, Verma S, Osorio L, Peres NA, Weg E van de, Whitaker VM. Pedigree-Based Analysis in  
1466 a multiparental population of octoploid strawberry reveals QTL alleles conferring resistance to  
1467 *Phytophthora cactorum*. G3: Genes, Genomes, Genetics. 2017;7: 1707–1719.  
1468 doi:10.1534/g3.117.042119
- 1469 69. Anciro A, Mangandi J, Verma S, Peres N, Whitaker VM, Lee S. FaRCg1: a quantitative trait locus  
1470 conferring resistance to *Colletotrichum crown rot* caused by *Colletotrichum gloeosporioides* in  
1471 octoploid strawberry. Theor Appl Genet. 2018;131: 2167–2177. doi:10.1007/s00122-018-3145-z

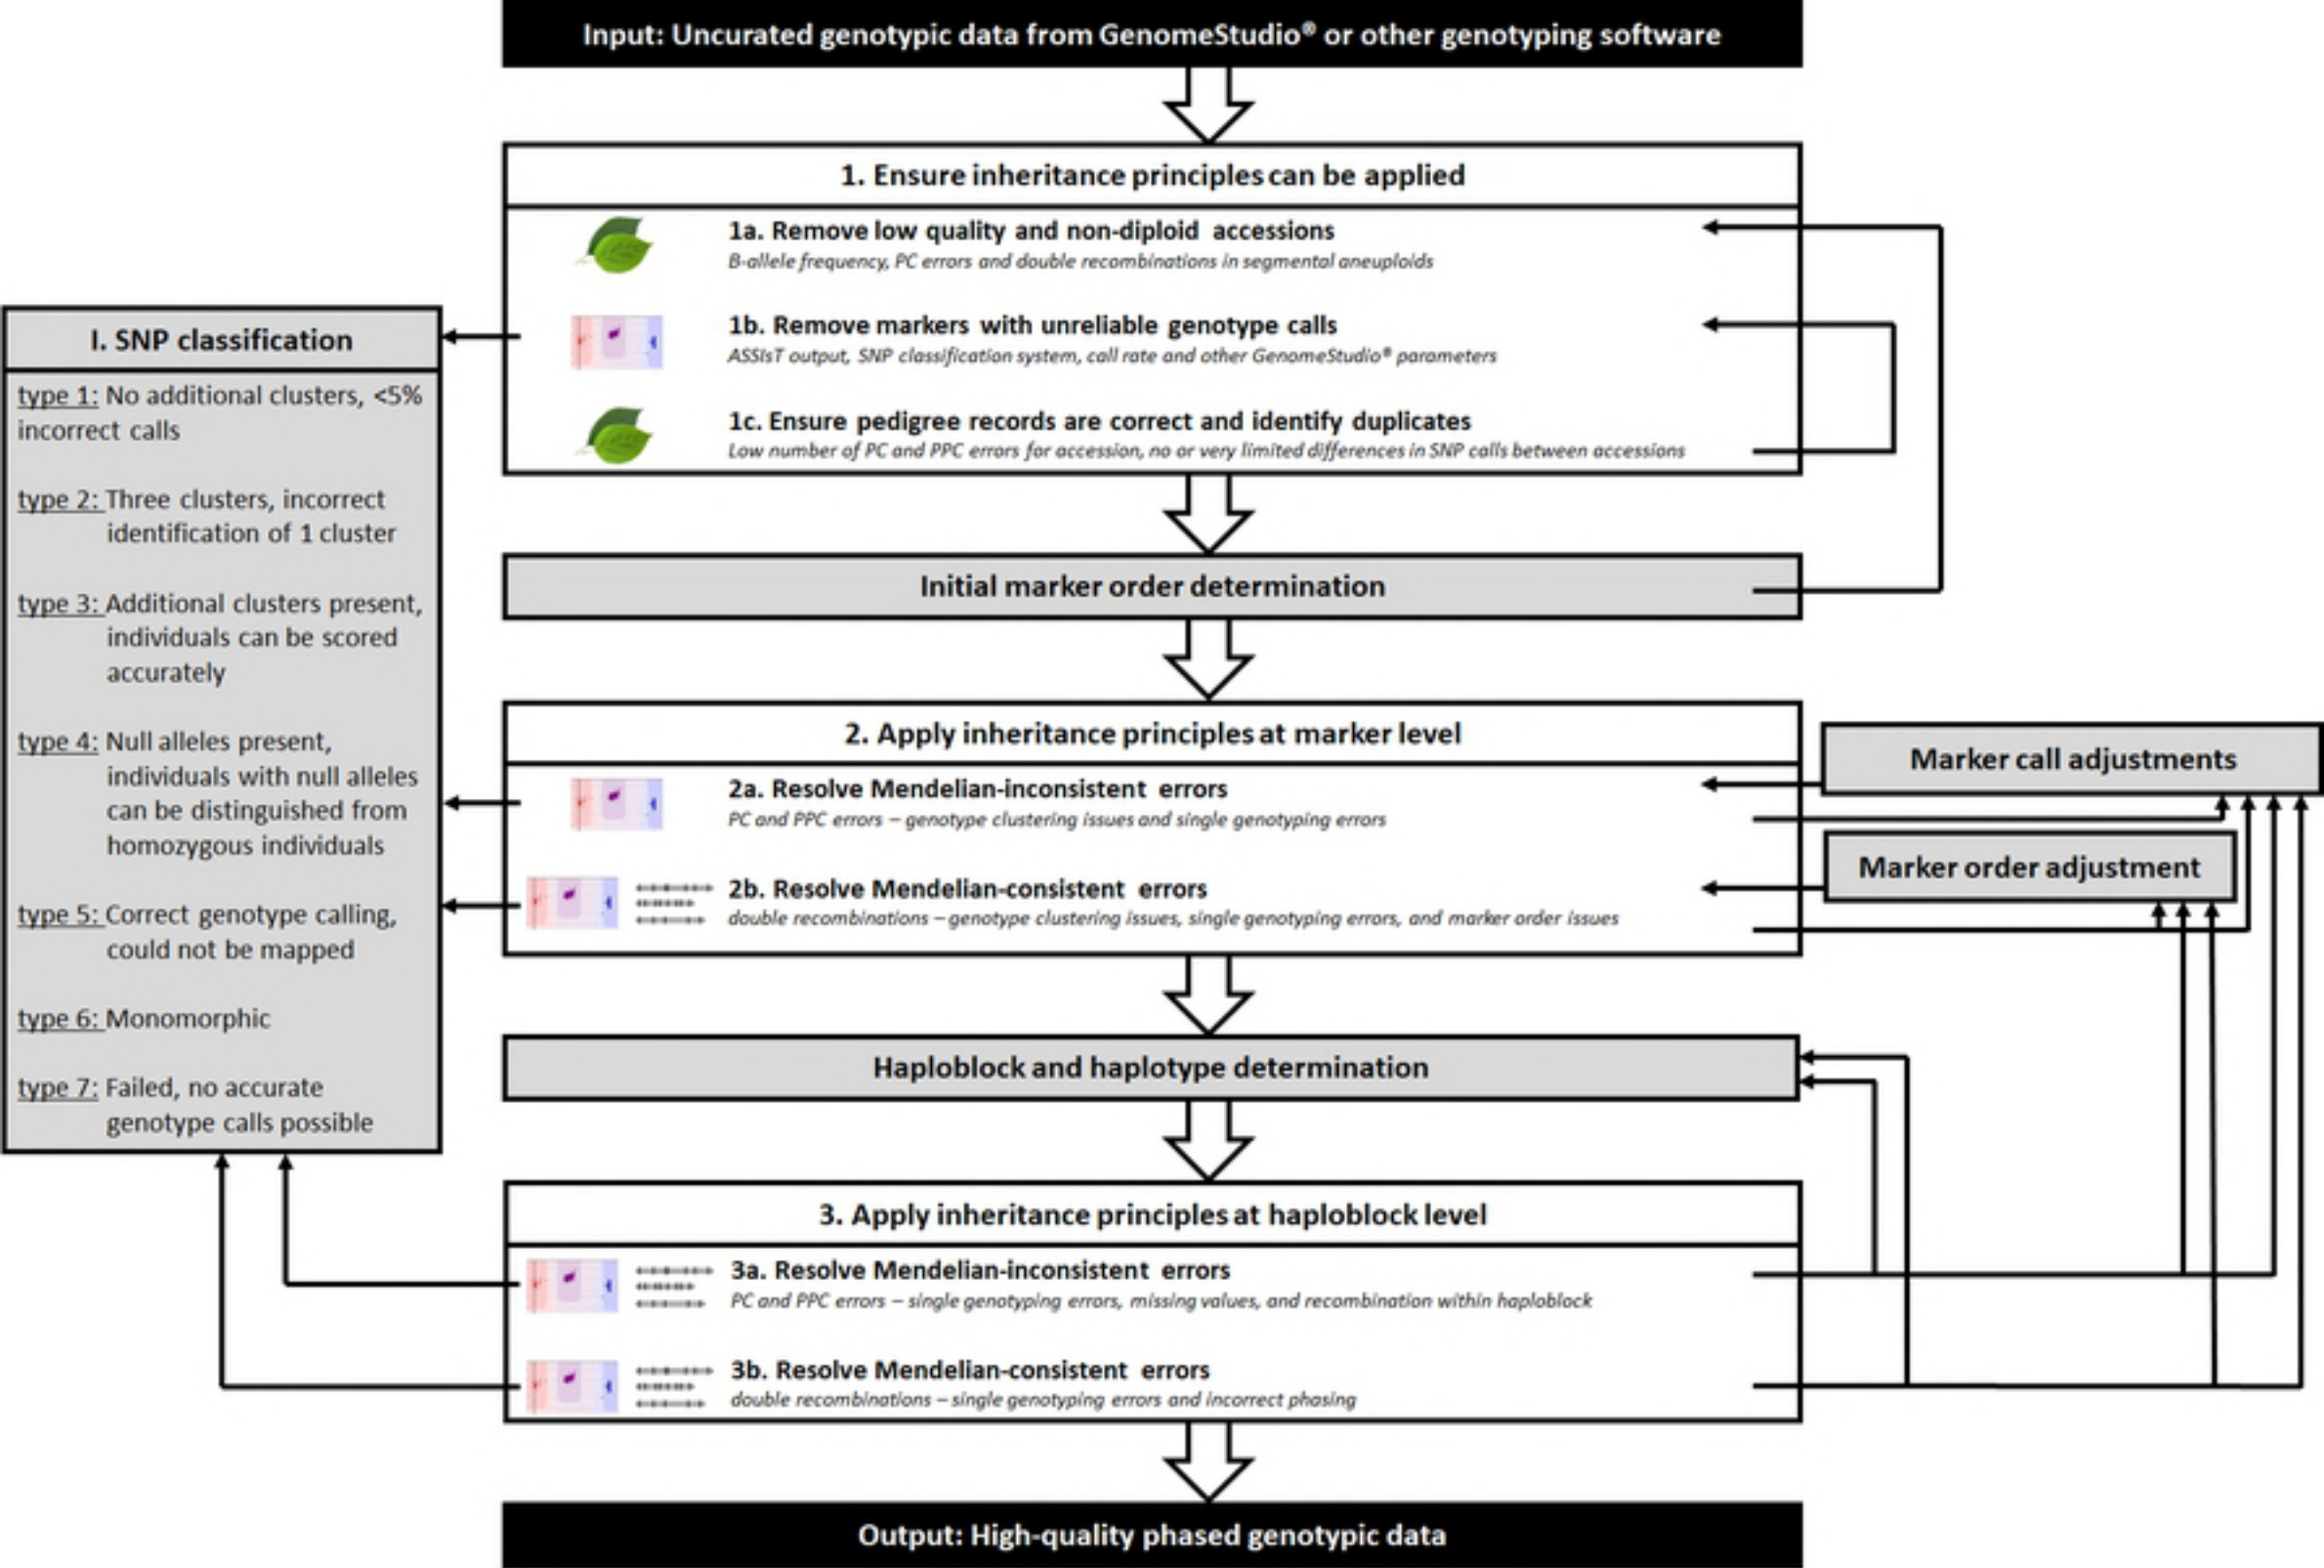

Figure 1

**A**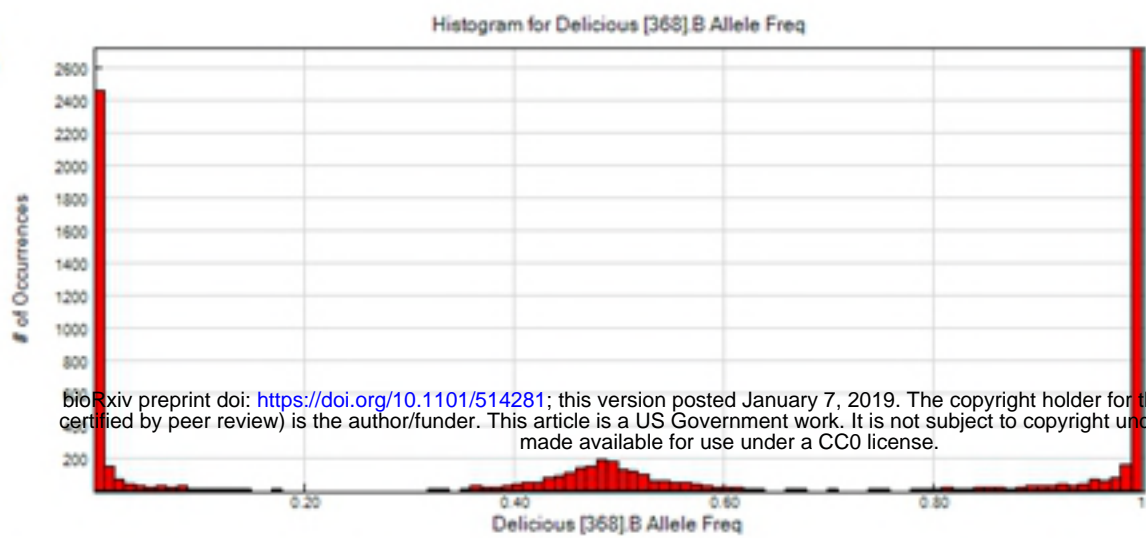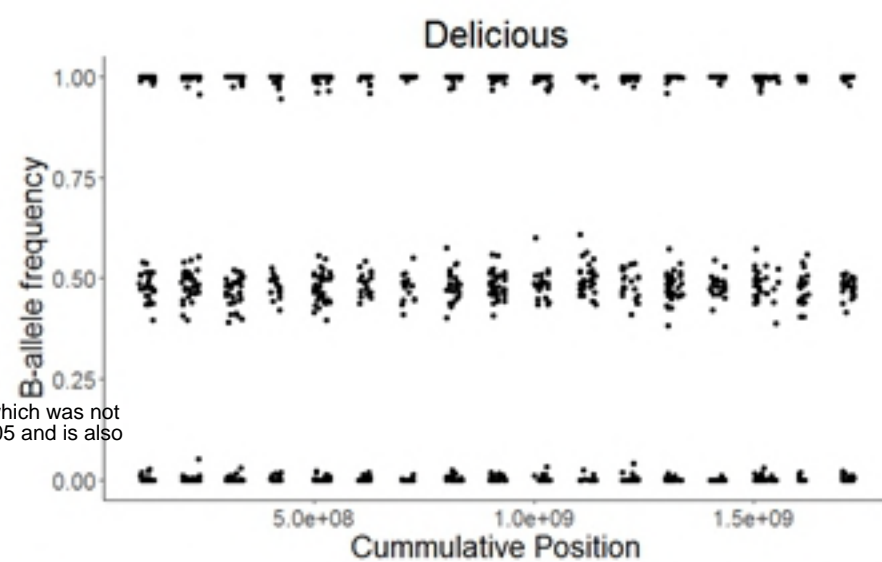**B**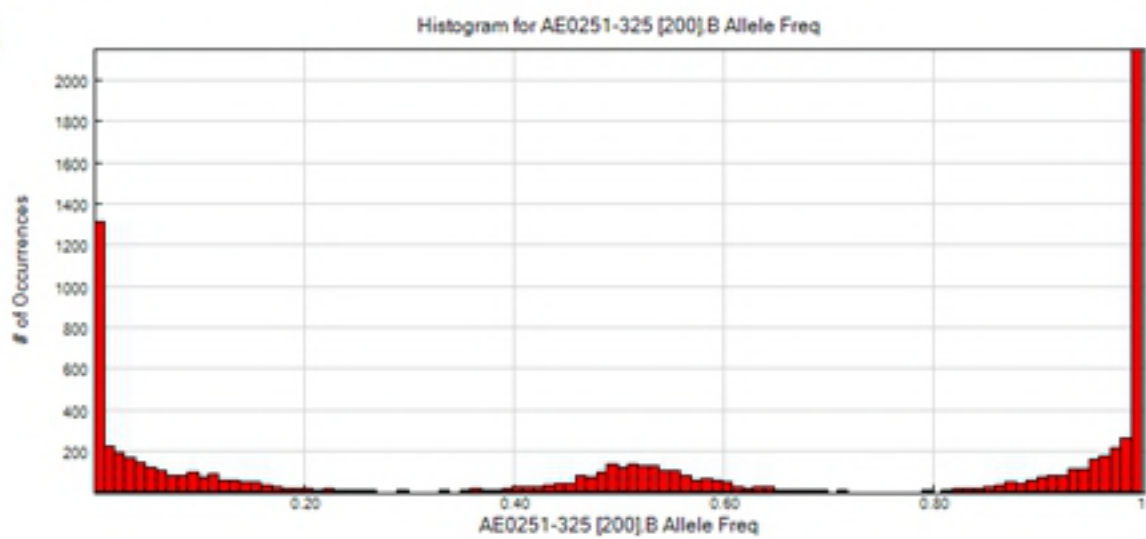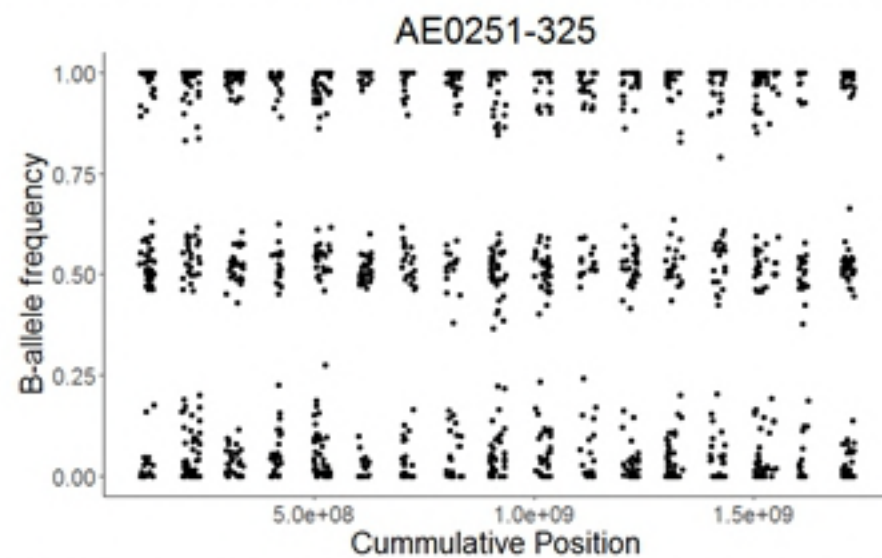**C**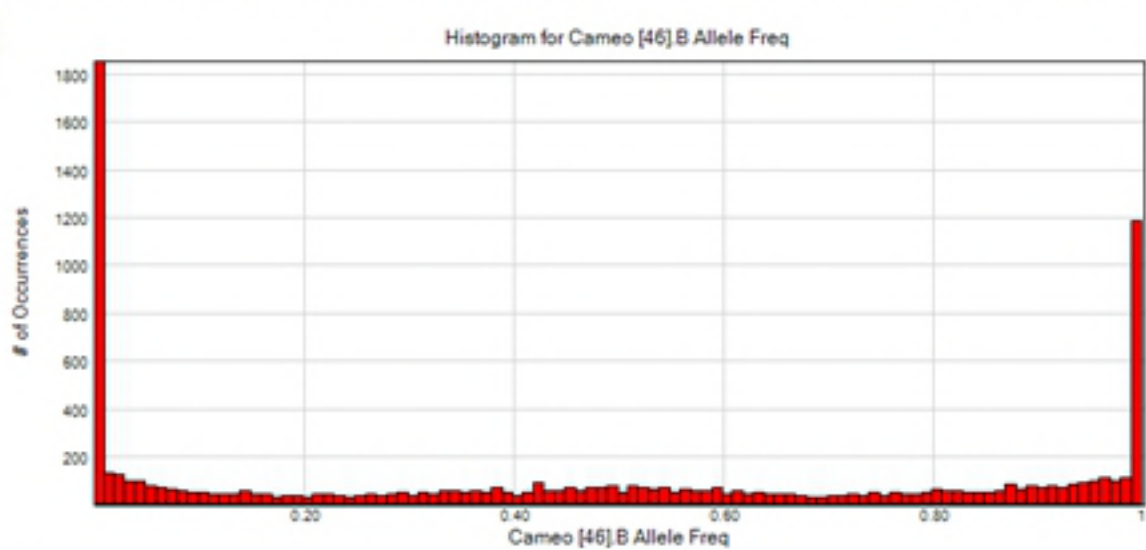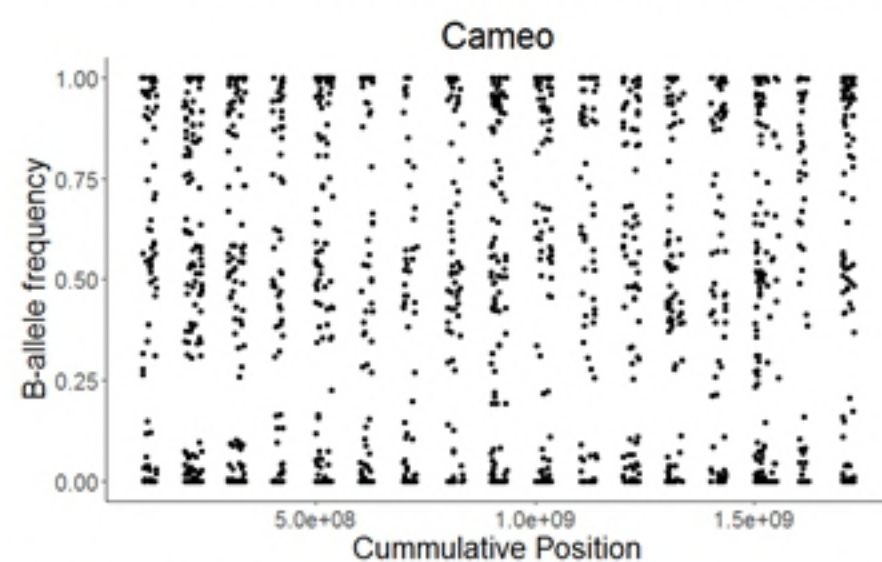**D**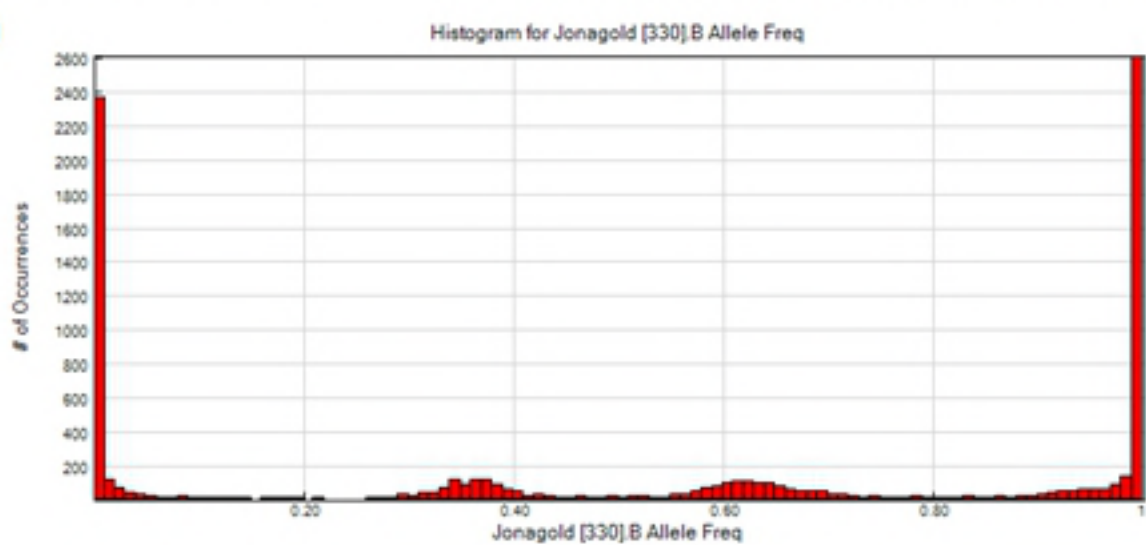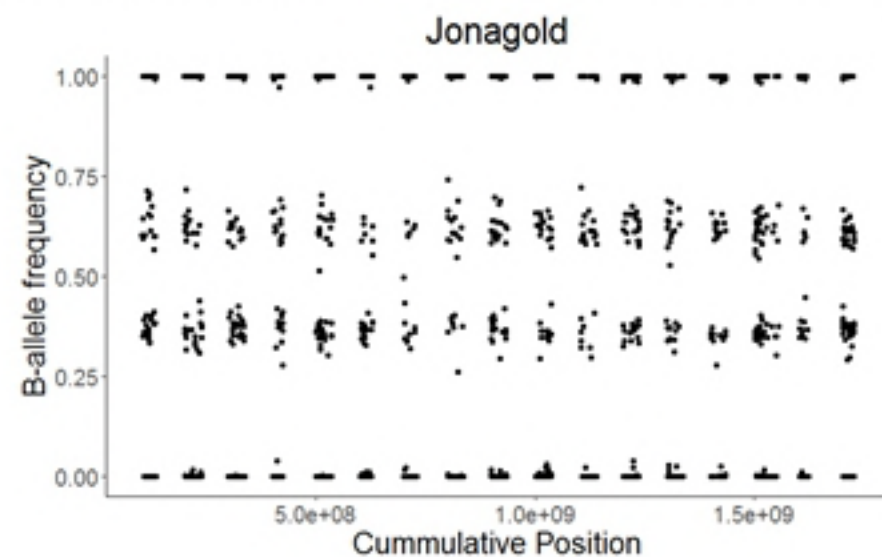

Figure 2
